# Supplementary material
Source: ML conference proceedings conference paper supplement (https://openaccess.thecvf.com/content/ICCV_2017/html/Remelli_Low-Dimensionality_Calibration_Through_ICCV_2017_paper.html)
Supplement: Supplementary file 1 [file Remelli_Low-Dimensionality_Calibration_Through_ICCV_2017_supplemental.zip]

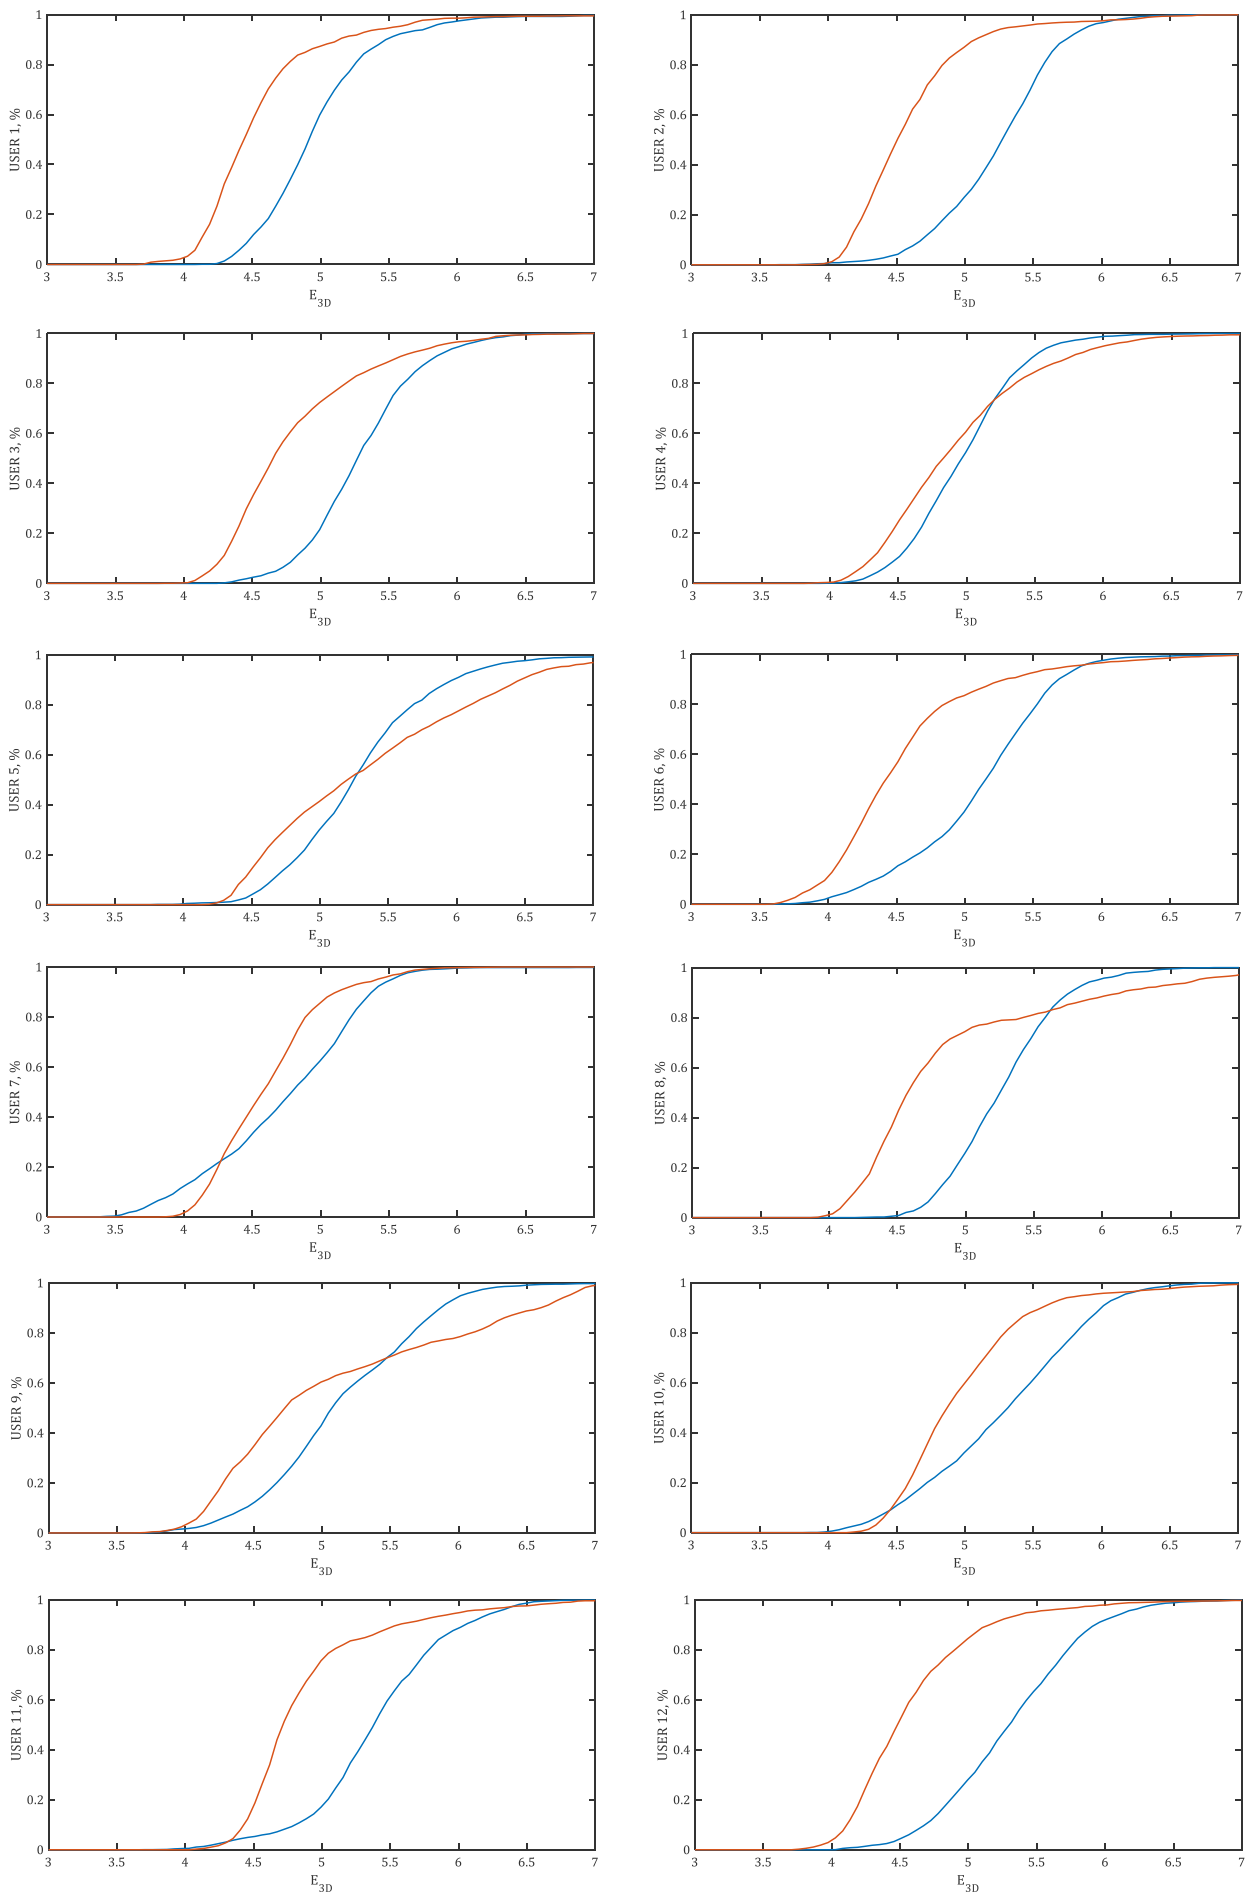

Figure 12: Evaluation on the Handy/GuessWho dataset from Tkach et al. [29]. The tracking performance of the model calibrated by the [Proposed Method] is quantitatively evaluated against the state-of-the-art tracking algorithm by Taylor et al. [27] whose calibration was performed by the calibration of Tan et al. [24]. These comparisons are courtesy of the authors, and the metrics are computed by comparing the depth maps of the rendered tracked models; see Figure 10
