# Supplementary material
Source: ML conference proceedings conference paper supplement (https://openaccess.thecvf.com/content/ICCV_2017/html/Remelli_Low-Dimensionality_Calibration_Through_ICCV_2017_paper.html)
Supplement: Supplementary file 3 [file Remelli_Low-Dimensionality_Calibration_Through_ICCV_2017_supplemental.zip]

Archive with 663 entries (578 files):
- additional_material/
- additional_material/.DS_Store
- __MACOSX/
- __MACOSX/additional_material/
- __MACOSX/additional_material/._.DS_Store
- additional_material/code/
- additional_material/code/hmodel/
- additional_material/code/hmodel/data/
- additional_material/code/hmodel/data/USER1/
- additional_material/code/hmodel/data/USER1/1/
- additional_material/code/hmodel/data/USER1/1/B.txt
- __MACOSX/additional_material/code/
- __MACOSX/additional_material/code/hmodel/
- __MACOSX/additional_material/code/hmodel/data/
- __MACOSX/additional_material/code/hmodel/data/USER1/
- __MACOSX/additional_material/code/hmodel/data/USER1/1/
- __MACOSX/additional_material/code/hmodel/data/USER1/1/._B.txt
- additional_material/code/hmodel/data/USER1/1/C.txt
- __MACOSX/additional_material/code/hmodel/data/USER1/1/._C.txt
- additional_material/code/hmodel/data/USER1/1/color.png
- __MACOSX/additional_material/code/hmodel/data/USER1/1/._color.png
- additional_material/code/hmodel/data/USER1/1/depth.png
- __MACOSX/additional_material/code/hmodel/data/USER1/1/._depth.png
- additional_material/code/hmodel/data/USER1/1/I.txt
- __MACOSX/additional_material/code/hmodel/data/USER1/1/._I.txt
- additional_material/code/hmodel/data/USER1/1/mask.png
- __MACOSX/additional_material/code/hmodel/data/USER1/1/._mask.png
- additional_material/code/hmodel/data/USER1/1/R.txt
- __MACOSX/additional_material/code/hmodel/data/USER1/1/._R.txt
- additional_material/code/hmodel/data/USER1/1/T.txt
- __MACOSX/additional_material/code/hmodel/data/USER1/1/._T.txt
- additional_material/code/hmodel/data/USER1/1/V.txt
- __MACOSX/additional_material/code/hmodel/data/USER1/1/._V.txt
- __MACOSX/additional_material/code/hmodel/data/USER1/._1
- additional_material/code/hmodel/data/USER1/2/
- additional_material/code/hmodel/data/USER1/2/B.txt
- __MACOSX/additional_material/code/hmodel/data/USER1/2/
- __MACOSX/additional_material/code/hmodel/data/USER1/2/._B.txt
- additional_material/code/hmodel/data/USER1/2/C.txt
- __MACOSX/additional_material/code/hmodel/data/USER1/2/._C.txt
- additional_material/code/hmodel/data/USER1/2/color.png
- __MACOSX/additional_material/code/hmodel/data/USER1/2/._color.png
- additional_material/code/hmodel/data/USER1/2/depth.png
- __MACOSX/additional_material/code/hmodel/data/USER1/2/._depth.png
- additional_material/code/hmodel/data/USER1/2/I.txt
- __MACOSX/additional_material/code/hmodel/data/USER1/2/._I.txt
- additional_material/code/hmodel/data/USER1/2/mask.png
- __MACOSX/additional_material/code/hmodel/data/USER1/2/._mask.png
- additional_material/code/hmodel/data/USER1/2/R.txt
- __MACOSX/additional_material/code/hmodel/data/USER1/2/._R.txt
- additional_material/code/hmodel/data/USER1/2/T.txt
- __MACOSX/additional_material/code/hmodel/data/USER1/2/._T.txt
- additional_material/code/hmodel/data/USER1/2/V.txt
- __MACOSX/additional_material/code/hmodel/data/USER1/2/._V.txt
- __MACOSX/additional_material/code/hmodel/data/USER1/._2
- additional_material/code/hmodel/data/USER1/3/
- additional_material/code/hmodel/data/USER1/3/B.txt
- __MACOSX/additional_material/code/hmodel/data/USER1/3/
- __MACOSX/additional_material/code/hmodel/data/USER1/3/._B.txt
- additional_material/code/hmodel/data/USER1/3/C.txt
- __MACOSX/additional_material/code/hmodel/data/USER1/3/._C.txt
- additional_material/code/hmodel/data/USER1/3/color.png
- __MACOSX/additional_material/code/hmodel/data/USER1/3/._color.png
- additional_material/code/hmodel/data/USER1/3/depth.png
- __MACOSX/additional_material/code/hmodel/data/USER1/3/._depth.png
- additional_material/code/hmodel/data/USER1/3/I.txt
- __MACOSX/additional_material/code/hmodel/data/USER1/3/._I.txt
- additional_material/code/hmodel/data/USER1/3/mask.png
- __MACOSX/additional_material/code/hmodel/data/USER1/3/._mask.png
- additional_material/code/hmodel/data/USER1/3/R.txt
- __MACOSX/additional_material/code/hmodel/data/USER1/3/._R.txt
- additional_material/code/hmodel/data/USER1/3/T.txt
- __MACOSX/additional_material/code/hmodel/data/USER1/3/._T.txt
- additional_material/code/hmodel/data/USER1/3/V.txt
- __MACOSX/additional_material/code/hmodel/data/USER1/3/._V.txt
- __MACOSX/additional_material/code/hmodel/data/USER1/._3
- additional_material/code/hmodel/data/USER1/4/
- additional_material/code/hmodel/data/USER1/4/B.txt
- __MACOSX/additional_material/code/hmodel/data/USER1/4/
- __MACOSX/additional_material/code/hmodel/data/USER1/4/._B.txt
- additional_material/code/hmodel/data/USER1/4/C.txt
- __MACOSX/additional_material/code/hmodel/data/USER1/4/._C.txt
- additional_material/code/hmodel/data/USER1/4/color.png
- __MACOSX/additional_material/code/hmodel/data/USER1/4/._color.png
- additional_material/code/hmodel/data/USER1/4/depth.png
- __MACOSX/additional_material/code/hmodel/data/USER1/4/._depth.png
- additional_material/code/hmodel/data/USER1/4/I.txt
- __MACOSX/additional_material/code/hmodel/data/USER1/4/._I.txt
- additional_material/code/hmodel/data/USER1/4/mask.png
- __MACOSX/additional_material/code/hmodel/data/USER1/4/._mask.png
- additional_material/code/hmodel/data/USER1/4/R.txt
- __MACOSX/additional_material/code/hmodel/data/USER1/4/._R.txt
- additional_material/code/hmodel/data/USER1/4/T.txt
- __MACOSX/additional_material/code/hmodel/data/USER1/4/._T.txt
- additional_material/code/hmodel/data/USER1/4/V.txt
- __MACOSX/additional_material/code/hmodel/data/USER1/4/._V.txt
- __MACOSX/additional_material/code/hmodel/data/USER1/._4
- additional_material/code/hmodel/data/USER1/5/
- additional_material/code/hmodel/data/USER1/5/B.txt
- __MACOSX/additional_material/code/hmodel/data/USER1/5/
- __MACOSX/additional_material/code/hmodel/data/USER1/5/._B.txt
- additional_material/code/hmodel/data/USER1/5/C.txt
- __MACOSX/additional_material/code/hmodel/data/USER1/5/._C.txt
- additional_material/code/hmodel/data/USER1/5/color.png
- __MACOSX/additional_material/code/hmodel/data/USER1/5/._color.png
- additional_material/code/hmodel/data/USER1/5/depth.png
- __MACOSX/additional_material/code/hmodel/data/USER1/5/._depth.png
- additional_material/code/hmodel/data/USER1/5/I.txt
- __MACOSX/additional_material/code/hmodel/data/USER1/5/._I.txt
- additional_material/code/hmodel/data/USER1/5/mask.png
- __MACOSX/additional_material/code/hmodel/data/USER1/5/._mask.png
- additional_material/code/hmodel/data/USER1/5/R.txt
- __MACOSX/additional_material/code/hmodel/data/USER1/5/._R.txt
- additional_material/code/hmodel/data/USER1/5/T.txt
- __MACOSX/additional_material/code/hmodel/data/USER1/5/._T.txt
- additional_material/code/hmodel/data/USER1/5/V.txt
- __MACOSX/additional_material/code/hmodel/data/USER1/5/._V.txt
- __MACOSX/additional_material/code/hmodel/data/USER1/._5
- additional_material/code/hmodel/data/USER1/6/
- additional_material/code/hmodel/data/USER1/6/B.txt
- __MACOSX/additional_material/code/hmodel/data/USER1/6/
- __MACOSX/additional_material/code/hmodel/data/USER1/6/._B.txt
- additional_material/code/hmodel/data/USER1/6/C.txt
- __MACOSX/additional_material/code/hmodel/data/USER1/6/._C.txt
- additional_material/code/hmodel/data/USER1/6/color.png
- __MACOSX/additional_material/code/hmodel/data/USER1/6/._color.png
- additional_material/code/hmodel/data/USER1/6/depth.png
- __MACOSX/additional_material/code/hmodel/data/USER1/6/._depth.png
- additional_material/code/hmodel/data/USER1/6/I.txt
- __MACOSX/additional_material/code/hmodel/data/USER1/6/._I.txt
- additional_material/code/hmodel/data/USER1/6/mask.png
- __MACOSX/additional_material/code/hmodel/data/USER1/6/._mask.png
- additional_material/code/hmodel/data/USER1/6/R.txt
- __MACOSX/additional_material/code/hmodel/data/USER1/6/._R.txt
- additional_material/code/hmodel/data/USER1/6/T.txt
- __MACOSX/additional_material/code/hmodel/data/USER1/6/._T.txt
- additional_material/code/hmodel/data/USER1/6/V.txt
- __MACOSX/additional_material/code/hmodel/data/USER1/6/._V.txt
- __MACOSX/additional_material/code/hmodel/data/USER1/._6
- additional_material/code/hmodel/data/USER1/7/
- additional_material/code/hmodel/data/USER1/7/B.txt
- __MACOSX/additional_material/code/hmodel/data/USER1/7/
- __MACOSX/additional_material/code/hmodel/data/USER1/7/._B.txt
- additional_material/code/hmodel/data/USER1/7/C.txt
- __MACOSX/additional_material/code/hmodel/data/USER1/7/._C.txt
- additional_material/code/hmodel/data/USER1/7/color.png
- __MACOSX/additional_material/code/hmodel/data/USER1/7/._color.png
- additional_material/code/hmodel/data/USER1/7/depth.png
- __MACOSX/additional_material/code/hmodel/data/USER1/7/._depth.png
- additional_material/code/hmodel/data/USER1/7/I.txt
- __MACOSX/additional_material/code/hmodel/data/USER1/7/._I.txt
- additional_material/code/hmodel/data/USER1/7/mask.png
- __MACOSX/additional_material/code/hmodel/data/USER1/7/._mask.png
- additional_material/code/hmodel/data/USER1/7/R.txt
- __MACOSX/additional_material/code/hmodel/data/USER1/7/._R.txt
- additional_material/code/hmodel/data/USER1/7/T.txt
- __MACOSX/additional_material/code/hmodel/data/USER1/7/._T.txt
- additional_material/code/hmodel/data/USER1/7/V.txt
- __MACOSX/additional_material/code/hmodel/data/USER1/7/._V.txt
- __MACOSX/additional_material/code/hmodel/data/USER1/._7
- additional_material/code/hmodel/data/USER1/8/
- additional_material/code/hmodel/data/USER1/8/B.txt
- __MACOSX/additional_material/code/hmodel/data/USER1/8/
- __MACOSX/additional_material/code/hmodel/data/USER1/8/._B.txt
- additional_material/code/hmodel/data/USER1/8/C.txt
- __MACOSX/additional_material/code/hmodel/data/USER1/8/._C.txt
- additional_material/code/hmodel/data/USER1/8/color.png
- __MACOSX/additional_material/code/hmodel/data/USER1/8/._color.png
- additional_material/code/hmodel/data/USER1/8/depth.png
- __MACOSX/additional_material/code/hmodel/data/USER1/8/._depth.png
- additional_material/code/hmodel/data/USER1/8/I.txt
- __MACOSX/additional_material/code/hmodel/data/USER1/8/._I.txt
- additional_material/code/hmodel/data/USER1/8/mask.png
- __MACOSX/additional_material/code/hmodel/data/USER1/8/._mask.png
- additional_material/code/hmodel/data/USER1/8/R.txt
- __MACOSX/additional_material/code/hmodel/data/USER1/8/._R.txt
- additional_material/code/hmodel/data/USER1/8/T.txt
- __MACOSX/additional_material/code/hmodel/data/USER1/8/._T.txt
- additional_material/code/hmodel/data/USER1/8/V.txt
- __MACOSX/additional_material/code/hmodel/data/USER1/8/._V.txt
- __MACOSX/additional_material/code/hmodel/data/USER1/._8
- __MACOSX/additional_material/code/hmodel/data/._USER1
- __MACOSX/additional_material/code/hmodel/._data
- additional_material/code/hmodel/display/
- additional_material/code/hmodel/display/display_model.m
- __MACOSX/additional_material/code/hmodel/display/
- __MACOSX/additional_material/code/hmodel/display/._display_model.m
- additional_material/code/hmodel/display/myline.m
- __MACOSX/additional_material/code/hmodel/display/._myline.m
- additional_material/code/hmodel/display/mylines.m
- __MACOSX/additional_material/code/hmodel/display/._mylines.m
- additional_material/code/hmodel/display/mypoint.m
- __MACOSX/additional_material/code/hmodel/display/._mypoint.m
- additional_material/code/hmodel/display/mypoints.m
- __MACOSX/additional_material/code/hmodel/display/._mypoints.m
- __MACOSX/additional_material/code/hmodel/._display
- additional_material/code/hmodel/gradient/
- additional_material/code/hmodel/gradient/cross_derivative.m
- __MACOSX/additional_material/code/hmodel/gradient/
- __MACOSX/additional_material/code/hmodel/gradient/._cross_derivative.m
- additional_material/code/hmodel/gradient/cross_handle.m
- __MACOSX/additional_material/code/hmodel/gradient/._cross_handle.m
- additional_material/code/hmodel/gradient/difference_derivative.m
- __MACOSX/additional_material/code/hmodel/gradient/._difference_derivative.m
- additional_material/code/hmodel/gradient/difference_handle.m
- __MACOSX/additional_material/code/hmodel/gradient/._difference_handle.m
- additional_material/code/hmodel/gradient/dot_derivative.m
- __MACOSX/additional_material/code/hmodel/gradient/._dot_derivative.m
- additional_material/code/hmodel/gradient/dot_handle.m
- __MACOSX/additional_material/code/hmodel/gradient/._dot_handle.m
- additional_material/code/hmodel/gradient/minus_derivative.m
- __MACOSX/additional_material/code/hmodel/gradient/._minus_derivative.m
- additional_material/code/hmodel/gradient/minus_handle.m
- __MACOSX/additional_material/code/hmodel/gradient/._minus_handle.m
- additional_material/code/hmodel/gradient/my_cross.m
- __MACOSX/additional_material/code/hmodel/gradient/._my_cross.m
- additional_material/code/hmodel/gradient/my_gradient.m
- __MACOSX/additional_material/code/hmodel/gradient/._my_gradient.m
- additional_material/code/hmodel/gradient/norm_derivative.m
- __MACOSX/additional_material/code/hmodel/gradient/._norm_derivative.m
- additional_material/code/hmodel/gradient/norm_handle.m
- __MACOSX/additional_material/code/hmodel/gradient/._norm_handle.m
- additional_material/code/hmodel/gradient/normalize_derivative.m
- __MACOSX/additional_material/code/hmodel/gradient/._normalize_derivative.m
- additional_material/code/hmodel/gradient/normalize_handle.m
- __MACOSX/additional_material/code/hmodel/gradient/._normalize_handle.m
- additional_material/code/hmodel/gradient/product_derivative.m
- __MACOSX/additional_material/code/hmodel/gradient/._product_derivative.m
- additional_material/code/hmodel/gradient/product_handle.m
- __MACOSX/additional_material/code/hmodel/gradient/._product_handle.m
- additional_material/code/hmodel/gradient/ratio_derivative.m
- __MACOSX/additional_material/code/hmodel/gradient/._ratio_derivative.m
- additional_material/code/hmodel/gradient/ratio_handle.m
- __MACOSX/additional_material/code/hmodel/gradient/._ratio_handle.m
- additional_material/code/hmodel/gradient/sqrt_derivative.m
- __MACOSX/additional_material/code/hmodel/gradient/._sqrt_derivative.m
- additional_material/code/hmodel/gradient/sqrt_handle.m
- __MACOSX/additional_material/code/hmodel/gradient/._sqrt_handle.m
- additional_material/code/hmodel/gradient/sum_derivative.m
- __MACOSX/additional_material/code/hmodel/gradient/._sum_derivative.m
- additional_material/code/hmodel/gradient/sum_handle.m
- __MACOSX/additional_material/code/hmodel/gradient/._sum_handle.m
- __MACOSX/additional_material/code/hmodel/._gradient
- additional_material/code/hmodel/main/
- additional_material/code/hmodel/main/MAIN_CALIBRATE.m
- __MACOSX/additional_material/code/hmodel/main/
- __MACOSX/additional_material/code/hmodel/main/._MAIN_CALIBRATE.m
- additional_material/code/hmodel/main/WRITE_CALIBRATED_MODEL_TO_FILE.m
- __MACOSX/additional_material/code/hmodel/main/._WRITE_CALIBRATED_MODEL_TO_FILE.m
- __MACOSX/additional_material/code/hmodel/._main
- additional_material/code/hmodel/mex/
- additional_material/code/hmodel/mex/closest_point_in_triangle_mex.mexw64
- __MACOSX/additional_material/code/hmodel/mex/
- __MACOSX/additional_material/code/hmodel/mex/._closest_point_in_triangle_mex.mexw64
- additional_material/code/hmodel/mex/compute_projections_mex.mexw64
- __MACOSX/additional_material/code/hmodel/mex/._compute_projections_mex.mexw64
- additional_material/code/hmodel/mex/distance_to_model_convsegment.mexw64
- __MACOSX/additional_material/code/hmodel/mex/._distance_to_model_convsegment.mexw64
- additional_material/code/hmodel/mex/distance_to_model_convtriangle.mexw64
- __MACOSX/additional_material/code/hmodel/mex/._distance_to_model_convtriangle.mexw64
- additional_material/code/hmodel/mex/dtform.mexw64
- __MACOSX/additional_material/code/hmodel/mex/._dtform.mexw64
- additional_material/code/hmodel/mex/projection_convsegment_mex.mexw64
- __MACOSX/additional_material/code/hmodel/mex/._projection_convsegment_mex.mexw64
- additional_material/code/hmodel/mex/render_model_mex.mexw64
- __MACOSX/additional_material/code/hmodel/mex/._render_model_mex.mexw64
- __MACOSX/additional_material/code/hmodel/._mex
- additional_material/code/hmodel/output/
- additional_material/code/hmodel/output/1/
- additional_material/code/hmodel/output/1/1.png
- __MACOSX/additional_material/code/hmodel/output/
- __MACOSX/additional_material/code/hmodel/output/1/
- __MACOSX/additional_material/code/hmodel/output/1/._1.png
- __MACOSX/additional_material/code/hmodel/output/._1
- additional_material/code/hmodel/output/10/
- additional_material/code/hmodel/output/10/1.png
- __MACOSX/additional_material/code/hmodel/output/10/
- __MACOSX/additional_material/code/hmodel/output/10/._1.png
- __MACOSX/additional_material/code/hmodel/output/._10
- additional_material/code/hmodel/output/11/
- additional_material/code/hmodel/output/11/1.png
- __MACOSX/additional_material/code/hmodel/output/11/
- __MACOSX/additional_material/code/hmodel/output/11/._1.png
- __MACOSX/additional_material/code/hmodel/output/._11
- additional_material/code/hmodel/output/12/
- additional_material/code/hmodel/output/12/1.png
- __MACOSX/additional_material/code/hmodel/output/12/
- __MACOSX/additional_material/code/hmodel/output/12/._1.png
- __MACOSX/additional_material/code/hmodel/output/._12
- additional_material/code/hmodel/output/13/
- additional_material/code/hmodel/output/13/1.png
- __MACOSX/additional_material/code/hmodel/output/13/
- __MACOSX/additional_material/code/hmodel/output/13/._1.png
- __MACOSX/additional_material/code/hmodel/output/._13
- additional_material/code/hmodel/output/14/
- additional_material/code/hmodel/output/14/1.png
- __MACOSX/additional_material/code/hmodel/output/14/
- __MACOSX/additional_material/code/hmodel/output/14/._1.png
- __MACOSX/additional_material/code/hmodel/output/._14
- additional_material/code/hmodel/output/15/
[truncated: 363 more entries]
