# Supplementary material
Source: ML conference proceedings conference paper supplement (https://openaccess.thecvf.com/content/ICCV_2017/html/Remelli_Low-Dimensionality_Calibration_Through_ICCV_2017_paper.html)
Supplement: Supplementary file 3 [file Remelli_Low-Dimensionality_Calibration_Through_ICCV_2017_supplemental.zip › additional_material/code/hmodel/data/USER1/1/B.txt]

30
1 0 32767 2 1 32767 3 2 32767 5 4 32767 6 5 32767 7 6 32767 9 8 32767 10 9 32767 11 10 32767 13 12 32767 14 13 32767 15 14 32767 17 16 32767 18 17 32767 19 18 33 26 21 20 25 26 21 25 22 21 25 27 22 27 22 23 20 29 28 21 20 29 21 30 29 22 21 30 22 23 30 23 30 31 19 33 24 16 32 32767 36 35 34 37 36 35 
