# Supplementary material
Source: ML conference proceedings conference paper supplement (https://openaccess.thecvf.com/content/ICCV_2017/html/Remelli_Low-Dimensionality_Calibration_Through_ICCV_2017_paper.html)
Supplement: Supplementary file 3 [file Remelli_Low-Dimensionality_Calibration_Through_ICCV_2017_supplemental.zip › additional_material/code/hmodel/data/USER1/1/C.txt]

38
-41.5696 129.314 -41.0642 -38.338 118.759 -34.5453 -32.0329 103.869 -24.3197 -18.1418 78.8306 -10.0327 -7.98385 150.707 -40.7878 -9.84803 139.629 -33.1203 -10.4135 120.234 -19.1596 -7.88253 85.4166 -4.33694 15.194 158.074 -41.0634 13.0326 146.683 -30.1727 10.9037 127.404 -17.3181 5.50868 90.4683 -1.62027 45.067 148.572 -30.2141 41.3779 138.633 -22.9832 35.2101 121.304 -13.7153 23.5518 88.752 -0.390411 73.8308 77.5826 -22.0208 68.2189 69.4808 -12.0331 46.8367 53.6458 -2.00021 12.8172 38.8598 -0.130493 -16.8004 71.7398 -11.058 -7.0178 77.7828 -6.28326 4.24494 81.62 -2.90594 22.7618 83.1281 -0.66153 27.8834 78.8134 0.309814 1.31472 36.4477 4.63702 -8.30531 36.4215 1.66394 8.24632 40.1562 5.73798 -25.0312 91.3221 -22.2551 -6.54004 100.592 -14.9367 7.95473 102.316 -11.8129 26.3653 98.1719 -11.009 77.4465 81.4161 -26.4853 36.2512 56.0656 -0.0601501 9.20692 32.2651 10.2541 -5.64438 33.367 3.79398 -7.19536 -6.08537 27.1439 -14.621 -5.53443 23.9139 
