# Supplementary material
Source: ML conference proceedings conference paper supplement (https://openaccess.thecvf.com/content/ICCV_2017/html/Remelli_Low-Dimensionality_Calibration_Through_ICCV_2017_paper.html)
Supplement: Supplementary file 3 [file Remelli_Low-Dimensionality_Calibration_Through_ICCV_2017_supplemental.zip › additional_material/code/hmodel/data/USER1/1/R.txt]

38
4.18002 4.77166 6.22559 7.84562 4.84959 5.01217 6.97092 7.26768 5.58432 5.67621 7.64302 7.68834 5.17427 5.85299 7.55251 8.44143 7.0311 7.30846 10.3118 15.6827 8.98482 10.2172 10.726 9.50548 4.7635 13.6244 13.4193 13.2994 1.75341 2.81212 3.15775 1.29623 4.99162 6.60392 12.9 12.9863 15.4 15.4213 
