# Supplementary material
Source: ML conference proceedings conference paper supplement (https://openaccess.thecvf.com/content/ICCV_2017/html/Remelli_Low-Dimensionality_Calibration_Through_ICCV_2017_paper.html)
Supplement: Supplementary file 3 [file Remelli_Low-Dimensionality_Calibration_Through_ICCV_2017_supplemental.zip › additional_material/code/hmodel/data/USER1/1/T.txt]

29
1.31472  -33.5523  404.637  2.7932  -2.81439  -3.13926  3.97809e-06  -0.207009  -0.187044  0.470784  0.762811  -0.173863  -0.395819  0.183178  0.143478  0.0966679  0.121753  0.141965  0.112346  0.172882  0.112707  0.0809426  -0.0578606  0.238751  -0.0945182  -0.061897  -0.137053  0.125617  -0.100098  
