# Supplementary material
Source: ML conference proceedings conference paper supplement (https://openaccess.thecvf.com/content/ICCV_2017/html/Remelli_Low-Dimensionality_Calibration_Through_ICCV_2017_paper.html)
Supplement: Supplementary file 3 [file Remelli_Low-Dimensionality_Calibration_Through_ICCV_2017_supplemental.zip › additional_material/code/hmodel/data/USER1/2/C.txt]

38
-51.9149 196.719 40.6839 -51.7323 182.974 46.0796 -49.4959 162.793 54.6458 -43.6657 129.32 68.9324 -9.95983 181.911 4.9827 -15.3316 175.032 17.9925 -21.7566 162.489 41.645 -30.1004 134.621 74.2352 14.5871 142.728 -9.10718 9.89158 144.967 8.46164 3.43608 148.819 34.1878 -13.6252 137.251 76.0291 41.6386 184.468 26.5051 35.4475 174.291 35.2564 25.5219 159.443 50.8725 6.35852 131.055 76.3401 47.1812 114.213 36.3515 42.8261 105.604 49.3184 21.4244 89.9066 68.5115 -17.4628 77.5492 81.3664 -43.9167 120.957 68.2318 -31.0926 125.703 72.5544 -17.2417 127.522 75.349 4.12042 124.903 76.5333 8.94165 118.88 77.6416 -30.5655 77.912 87.8163 -41.6362 80.0087 85.0677 -21.8049 80.4838 88.3072 -46.7263 146.356 55.9481 -24.0184 143.909 55.9668 -8.22991 136.462 58.6429 10.2886 137.576 61.5128 50.3802 118.15 30.2238 10.6719 94.0773 73.842 -23.6225 69.7146 93.5004 -39.2431 77.1682 86.4258 -55.8131 31.3463 106.856 -63.6233 35.0731 103.319 
