# Supplementary material
Source: ML conference proceedings conference paper supplement (https://openaccess.thecvf.com/content/ICCV_2017/html/Remelli_Low-Dimensionality_Calibration_Through_ICCV_2017_paper.html)
Supplement: Supplementary file 3 [file Remelli_Low-Dimensionality_Calibration_Through_ICCV_2017_supplemental.zip › additional_material/code/hmodel/data/USER1/2/I.txt]

17
1 0 0 0 0 1 0 0 0 0 1 0 0 0 0 1 -0.305523 0.319439 0.897003 11.2025 -0.766703 0.4761 -0.430691 4.46001 -0.564642 -0.819321 0.0994552 -8.24773 0 0 0 1 0.997074 -0.0749142 -0.0151859 0 0.0764379 0.977199 0.198088 42.7805 0 -0.198669 0.980067 0 0 0 0 1 0.998709 0.0497797 0.0100908 0 -0.0507922 0.978802 0.198413 32.7538 0 -0.198669 0.980067 0 0 0 0 1 -0.900232 -0.376838 0.218117 -20.8491 -0.395267 0.917393 -0.0464125 51.703 -0.182609 -0.127996 -0.974818 7.94519 0 0 0 1 0.998521 -0.0543646 0 0 0.0543646 0.998521 0 36.8587 0 0 1 0 0 0 0 1 0.996917 -0.0784591 0 0 0.0784591 0.996917 0 22.037 0 0 1 0 0 0 0 1 -0.98734 -0.158012 0.0138762 -6.83335 -0.15862 0.983554 -0.0863733 56.5608 0 -0.0874808 -0.996166 12.4389 0 0 0 1 0.999922 -0.012492 0 0 0.012492 0.999922 0 43.6852 0 0 1 0 0 0 0 1 0.996917 -0.0784591 0 0 0.0784591 0.996917 0 27.5328 0 0 1 0 0 0 0 1 -0.992608 -0.0159037 -0.120316 9.36686 -0.0199468 0.999274 0.0324749 60.9239 0.119712 0.0346348 -0.992204 12.1477 0 0 0 1 0.996917 0.0784591 0 0 -0.0784591 0.996917 0 46.6432 0 0 1 0 0 0 0 1 0.999891 -0.0147668 0 0 0.0147668 0.999891 0 26.8019 0 0 1 0 0 0 0 1 -0.95871 0.151187 -0.240868 29.2526 0.13524 0.987454 0.081515 58.5357 0.25017 0.0455744 -0.967129 6.08988 0 0 0 1 0.99978 0.0209711 0 0 -0.0209711 0.99978 0 42.6818 0 0 1 0 0 0 0 1 0.996802 0.0799147 0 0 -0.0799147 0.996802 0 23.7242 0 0 1 0 0 0 0 1 1 0 0 0 0 1 0 0 0 0 1 0 0 0 0 1 
