# Supplementary material
Source: ML conference proceedings conference paper supplement (https://openaccess.thecvf.com/content/ICCV_2017/html/Remelli_Low-Dimensionality_Calibration_Through_ICCV_2017_paper.html)
Supplement: Supplementary file 3 [file Remelli_Low-Dimensionality_Calibration_Through_ICCV_2017_supplemental.zip › additional_material/code/hmodel/data/USER1/2/R.txt]

38
4.81473 5.49621 7.17091 9.03693 5.58597 5.77324 8.02941 8.37123 6.43226 6.53811 8.80357 8.85577 5.95995 6.74173 8.69931 9.72321 8.09873 8.41821 11.8776 18.064 10.3491 11.7686 12.3547 10.9488 5.48681 15.6932 15.4569 15.3188 2.01965 3.23912 3.63723 1.49305 5.74957 7.60669 14.8588 14.9582 17.7384 17.7629 
