# Supplementary material
Source: ML conference proceedings conference paper supplement (https://openaccess.thecvf.com/content/ICCV_2017/html/Remelli_Low-Dimensionality_Calibration_Through_ICCV_2017_paper.html)
Supplement: Supplementary file 3 [file Remelli_Low-Dimensionality_Calibration_Through_ICCV_2017_supplemental.zip › additional_material/code/hmodel/data/USER1/2/T.txt]

29
-30.5655  7.91197  487.816  2.6863  -2.95773  2.97244  -0.000105507  -0.382987  -0.0241248  0.495984  0.534892  -0.224792  -0.334692  0.194306  0.3387  0.0763599  -0.100184  0.229015  0.882033  0.411968  -0.0898985  0.10788  0.346194  0.218795  -0.100172  0.110041  -0.191192  0.0177798  -0.100087  
