# Supplementary material
Source: ML conference proceedings conference paper supplement (https://openaccess.thecvf.com/content/ICCV_2017/html/Remelli_Low-Dimensionality_Calibration_Through_ICCV_2017_paper.html)
Supplement: Supplementary file 3 [file Remelli_Low-Dimensionality_Calibration_Through_ICCV_2017_supplemental.zip › additional_material/code/hmodel/data/USER1/3/C.txt]

38
-18.2537 181.713 22.3697 -23.1401 172.284 32.6305 -28.6156 158.441 48.8798 -31.9538 129.512 71.4746 7.48578 124.881 0.325287 1.25894 131.471 13.1009 -6.8348 142.555 36.9692 -18.9516 134.626 78.1846 20.6448 199.095 18.8411 16.4942 186.745 31.7238 10.6647 169.326 51.242 -2.73316 136.818 81.8897 51.9272 198.959 60.4378 45.8461 186.276 64.9822 35.7103 166.387 73.0154 16.8197 130.017 84.9351 46.6164 110.596 34.5803 45.2017 102.494 48.4936 28.6832 87.4633 72.4526 -9.40042 77.5818 89.2505 -32.4266 121.138 71.1053 -20.0601 125.675 76.7755 -6.59689 127.187 81.1826 14.3488 123.955 85.1118 18.7722 117.841 87.0639 -23.1707 78.6586 94.0081 -33.7373 80.9716 89.8238 -14.4467 80.9735 95.4692 -29.1008 142.733 54.5845 -11.4254 133.436 58.2114 2.10976 145.194 66.4498 22.1363 141.114 73.6921 48.4016 114.298 27.7691 18.7497 92.3337 78.7001 -16.6494 70.9984 100.827 -31.6704 77.6358 91.8875 -49.311 32.8663 113.708 -56.8215 36.185 109.238 
