# Supplementary material
Source: ML conference proceedings conference paper supplement (https://openaccess.thecvf.com/content/ICCV_2017/html/Remelli_Low-Dimensionality_Calibration_Through_ICCV_2017_paper.html)
Supplement: Supplementary file 3 [file Remelli_Low-Dimensionality_Calibration_Through_ICCV_2017_supplemental.zip › additional_material/code/hmodel/data/USER1/3/T.txt]

29
-23.1707  8.65856  494.008  2.62067  -2.86482  2.8819  -0.000120666  -0.317885  -0.0302646  0.404346  0.331683  -0.364904  -0.32909  0.0796545  -0.0295637  0.0592332  -0.0472584  0.023317  0.331667  0.077465  -0.100265  0.00470255  0.800841  0.598061  -0.0862194  0.16738  0.0676464  0.249835  -0.10014  
