# Supplementary material
Source: ML conference proceedings conference paper supplement (https://openaccess.thecvf.com/content/ICCV_2017/html/Remelli_Low-Dimensionality_Calibration_Through_ICCV_2017_paper.html)
Supplement: Supplementary file 3 [file Remelli_Low-Dimensionality_Calibration_Through_ICCV_2017_supplemental.zip › additional_material/code/hmodel/data/USER1/4/C.txt]

38
15.9254 124.581 9.73416 6.27346 127.619 20.4894 -6.5431 132.884 37.6254 -23.0617 131.732 70.5551 24.1196 182.052 15.7777 15.6907 175.452 27.2153 3.56595 163.671 48.9468 -12.2739 137.458 80.0978 26.1565 224.435 60.2143 21.6822 207.781 66.4055 15.0507 183.789 76.3444 2.45684 140.314 87.6088 65.2353 198.315 77.9987 56.8634 187.237 83.0666 42.8059 170.784 92.7889 20.8452 134.292 95.5738 49.8056 109.617 31.8034 46.7418 102.197 45.8309 30.6127 89.2995 71.2536 -4.0724 81.0544 94.8996 -23.1818 123.339 70.3354 -12.7362 128.444 78.7318 -0.827404 130.537 86.2661 18.5867 128.15 95.3215 22.5698 122.244 98.4861 -18.6164 81.7393 96.0901 -27.8871 83.5767 89.3678 -10.5949 84.399 99.5806 -13.0932 127.158 51.903 -1.72595 145.95 63.5564 8.90492 154.733 78.5235 29.4121 145.994 87.3588 52.3512 112.841 24.9907 22.0578 94.6524 78.9729 -13.5132 75.7198 105.333 -26.5508 80.0257 92.641 -47.9895 39.4311 118.796 -54.5083 41.584 112.45 
