# Supplementary material
Source: ML conference proceedings conference paper supplement (https://openaccess.thecvf.com/content/ICCV_2017/html/Remelli_Low-Dimensionality_Calibration_Through_ICCV_2017_paper.html)
Supplement: Supplementary file 3 [file Remelli_Low-Dimensionality_Calibration_Through_ICCV_2017_supplemental.zip › additional_material/code/hmodel/data/USER1/4/T.txt]

29
-18.6164  11.7393  496.09  2.55115  -2.6356  2.77048  -0.000125212  -0.238926  -0.183232  0.191061  -0.0443205  -0.23514  -0.211333  0.169897  -0.123359  0.390388  -0.100116  0.0361208  -0.118785  0.11174  -0.100103  -0.000577971  0.325743  0.203685  -0.100167  -0.0936168  0.889349  0.319816  -0.10005  
