# Supplementary material
Source: ML conference proceedings conference paper supplement (https://openaccess.thecvf.com/content/ICCV_2017/html/Remelli_Low-Dimensionality_Calibration_Through_ICCV_2017_paper.html)
Supplement: Supplementary file 3 [file Remelli_Low-Dimensionality_Calibration_Through_ICCV_2017_supplemental.zip › additional_material/code/hmodel/data/USER1/5/C.txt]

38
104.492 142.547 113.212 97.2561 130.026 110.222 84.7456 112.475 105.633 62.0512 84.2541 98.7686 78.7482 174.625 111.844 75.1407 159.663 108.918 65.8048 134.173 104.32 50.4875 94.1499 95.8385 57.0068 190.224 120.44 52.5968 172.704 117.384 45.7387 147.345 112.07 36.9182 103.826 97.7911 18.6417 186.698 123.632 18.6283 171.993 122.127 18.4016 148.709 117.582 17.7648 107.874 105.181 -47.8072 111.213 133.19 -36.0543 100.355 130.912 -10.7626 79.8197 127.529 16.0685 49.681 113.319 59.4741 77.0938 102.315 48.7231 86.3591 100.257 36.6529 93.9006 100.89 17.3051 101.497 106.597 10.6055 98.3783 109.075 24.5869 42.5218 103.854 35.7454 39.646 102.538 17.9888 48.7668 104.886 75.2131 98.9007 107.737 56.4369 112.555 104.94 41.2729 118.163 108.159 21.7489 120.281 115.574 -54.2777 115.795 133.846 -1.09332 77.7523 119.55 12.6038 40.5063 103.626 30.8177 36.4077 102.595 7.3763 -10.1491 93.9594 16.4833 -12.1984 93.4441 
