# Supplementary material
Source: ML conference proceedings conference paper supplement (https://openaccess.thecvf.com/content/ICCV_2017/html/Remelli_Low-Dimensionality_Calibration_Through_ICCV_2017_paper.html)
Supplement: Supplementary file 3 [file Remelli_Low-Dimensionality_Calibration_Through_ICCV_2017_supplemental.zip › additional_material/code/hmodel/data/USER1/5/T.txt]

29
24.5869  -27.4782  503.854  0.109093  -3.0977  0.363005  -0.000131446  -0.137685  -0.0864355  0.510753  0.679012  0.472472  0.0406297  0.252874  0.178202  -0.100047  -0.100201  0.217739  0.226876  -0.100673  -0.100653  0.165594  0.0226674  -0.0283787  -0.100257  0.0869022  0.0175561  0.0279638  -0.100131  
