# Supplementary material
Source: ML conference proceedings conference paper supplement (https://openaccess.thecvf.com/content/ICCV_2017/html/Remelli_Low-Dimensionality_Calibration_Through_ICCV_2017_paper.html)
Supplement: Supplementary file 3 [file Remelli_Low-Dimensionality_Calibration_Through_ICCV_2017_supplemental.zip › additional_material/code/hmodel/data/USER1/6/C.txt]

38
-36.005 134.377 -50.5595 -32.4986 121.11 -44.9071 -25.5242 102.177 -35.7731 -11.6525 71.2587 -20.8113 1.95246 158.706 -47.7243 -0.311304 144.568 -41.176 -1.25731 119.853 -28.7684 -0.0922112 78.7073 -13.4951 26.608 167.788 -44.7865 24.7381 151.204 -37.0023 22.1061 127.264 -24.9395 15.334 83.7397 -8.90073 60.5263 154.377 -28.2575 56.2916 140.889 -23.6933 49.2494 119.133 -16.9427 35.6199 80.423 -4.45895 98.8573 64.3428 -9.05829 87.1864 55.7044 -1.77728 58.0733 40.4379 -0.053772 18.2911 24.1307 0.145416 -10.6798 62.8776 -20.9185 0.415961 69.6215 -14.6623 13.1885 73.5265 -9.50272 34.1911 74.0028 -4.21667 39.4735 68.7535 -1.78632 4.19125 22.958 4.0672 -6.37876 23.3401 -0.831207 12.3309 26.7769 5.96576 -18.2929 87.0961 -34.1525 2.61811 96.8444 -24.6883 18.884 97.9375 -19.9085 39.8229 91.8969 -15.9179 105.272 68.2513 -11.7969 45.7325 43.603 0.805756 12.736 18.2084 11.39 -3.69686 19.3019 2.3407 -7.47988 -26.4377 29.0482 -15.6963 -25.891 24.5235 
