# Supplementary material
Source: ML conference proceedings conference paper supplement (https://openaccess.thecvf.com/content/ICCV_2017/html/Remelli_Low-Dimensionality_Calibration_Through_ICCV_2017_paper.html)
Supplement: Supplementary file 3 [file Remelli_Low-Dimensionality_Calibration_Through_ICCV_2017_supplemental.zip › additional_material/code/hmodel/data/USER1/6/I.txt]

17
1 0 0 0 0 1 0 0 0 0 1 0 0 0 0 1 -0.305523 0.319439 0.897003 11.2588 -0.766703 0.4761 -0.430691 4.48239 -0.564642 -0.819321 0.0994552 -8.28913 0 0 0 1 0.997074 -0.0749142 -0.0151859 0 0.0764379 0.977199 0.198088 42.9952 0 -0.198669 0.980067 0 0 0 0 1 0.998709 0.0497797 0.0100908 0 -0.0507922 0.978802 0.198413 32.9182 0 -0.198669 0.980067 0 0 0 0 1 -0.900232 -0.376838 0.218117 -20.9537 -0.395267 0.917393 -0.0464125 51.9625 -0.182609 -0.127996 -0.974818 7.98506 0 0 0 1 0.998521 -0.0543646 0 0 0.0543646 0.998521 0 37.0436 0 0 1 0 0 0 0 1 0.996917 -0.0784591 0 0 0.0784591 0.996917 0 22.1476 0 0 1 0 0 0 0 1 -0.98734 -0.158012 0.0138762 -6.86764 -0.15862 0.983554 -0.0863733 56.8447 0 -0.0874808 -0.996166 12.5013 0 0 0 1 0.999922 -0.012492 0 0 0.012492 0.999922 0 43.9044 0 0 1 0 0 0 0 1 0.996917 -0.0784591 0 0 0.0784591 0.996917 0 27.6709 0 0 1 0 0 0 0 1 -0.992608 -0.0159037 -0.120316 9.41387 -0.0199468 0.999274 0.0324749 61.2297 0.119712 0.0346348 -0.992204 12.2087 0 0 0 1 0.996917 0.0784591 0 0 -0.0784591 0.996917 0 46.8773 0 0 1 0 0 0 0 1 0.999891 -0.0147668 0 0 0.0147668 0.999891 0 26.9364 0 0 1 0 0 0 0 1 -0.95871 0.151187 -0.240868 29.3994 0.13524 0.987454 0.081515 58.8294 0.25017 0.0455744 -0.967129 6.12044 0 0 0 1 0.99978 0.0209711 0 0 -0.0209711 0.99978 0 42.896 0 0 1 0 0 0 0 1 0.996802 0.0799147 0 0 -0.0799147 0.996802 0 23.8433 0 0 1 0 0 0 0 1 1 0 0 0 0 1 0 0 0 0 1 0 0 0 0 1 
