# Supplementary material
Source: ML conference proceedings conference paper supplement (https://openaccess.thecvf.com/content/ICCV_2017/html/Remelli_Low-Dimensionality_Calibration_Through_ICCV_2017_paper.html)
Supplement: Supplementary file 3 [file Remelli_Low-Dimensionality_Calibration_Through_ICCV_2017_supplemental.zip › additional_material/code/hmodel/data/USER1/6/R.txt]

38
4.83889 5.52379 7.2069 9.08228 5.61401 5.80221 8.06971 8.41325 6.46455 6.57092 8.84775 8.90021 5.98986 6.77557 8.74297 9.77201 8.13938 8.46046 11.9372 18.1547 10.4011 11.8277 12.4167 11.0038 5.51435 15.7719 15.5345 15.3957 2.02979 3.25538 3.65549 1.50055 5.77842 7.64486 14.9334 15.0333 17.8274 17.8521 
