# Supplementary material
Source: ML conference proceedings conference paper supplement (https://openaccess.thecvf.com/content/ICCV_2017/html/Remelli_Low-Dimensionality_Calibration_Through_ICCV_2017_paper.html)
Supplement: Supplementary file 3 [file Remelli_Low-Dimensionality_Calibration_Through_ICCV_2017_supplemental.zip › additional_material/code/hmodel/data/USER1/6/T.txt]

29
4.19125  -47.042  404.067  2.63361  -2.7274  3.0071  -1.51798e-05  -0.154774  -0.0475602  0.518778  0.702679  0.127523  -0.325127  0.0859285  -0.0179141  -0.0149871  0.0117596  0.0705329  -0.0561879  0.0938121  -0.0916407  0.0613661  -0.238185  0.124868  -0.100119  -0.0165419  -0.337859  0.032748  -0.100274  
