# Supplementary material
Source: ML conference proceedings conference paper supplement (https://openaccess.thecvf.com/content/ICCV_2017/html/Remelli_Low-Dimensionality_Calibration_Through_ICCV_2017_paper.html)
Supplement: Supplementary file 3 [file Remelli_Low-Dimensionality_Calibration_Through_ICCV_2017_supplemental.zip › additional_material/code/hmodel/data/USER1/7/C.txt]

38
83.527 112.401 155.641 93.9242 120.473 148.947 92.82 116.221 127.353 66.1516 92.3908 118.437 73.5286 141.332 151.38 78.0051 151.781 140.6 72.1956 142.855 115.21 55.0403 102.679 115.131 60.2277 143.04 156.716 66.569 159.444 151.576 59.2415 155.408 126.113 41.987 113.1 116.736 31.9489 142.883 156.613 34.6559 157.274 158.625 28.3958 159.181 135.821 23.1634 118.465 124.135 -0.257195 110.454 192.591 -12.6878 104.618 184.068 -8.50972 82.9165 159.893 18.7628 60.9269 135.341 63.2822 85.56 122.386 52.9647 95.2243 119.974 41.2855 103.374 120.355 22.4153 112.2 125.889 15.6093 109.548 128.61 26.7836 52.875 126.162 37.7688 49.3887 124.865 20.5124 59.4827 126.945 81.1155 104.338 128.514 62.3044 122.092 120.362 49.5149 127.271 125.369 28.633 130.529 134.252 5.09044 113.639 197.545 -0.283867 84.0663 150.279 14.6421 52.4053 125.89 32.1898 46.0459 124.775 3.0426 3.04048 115.153 11.8164 -0.139236 114.595 
