# Supplementary material
Source: ML conference proceedings conference paper supplement (https://openaccess.thecvf.com/content/ICCV_2017/html/Remelli_Low-Dimensionality_Calibration_Through_ICCV_2017_paper.html)
Supplement: Supplementary file 3 [file Remelli_Low-Dimensionality_Calibration_Through_ICCV_2017_supplemental.zip › additional_material/code/hmodel/data/USER1/7/T.txt]

29
26.7836  -17.125  526.162  0.0592229  -3.08845  0.412967  -0.000142527  -0.0636544  -0.165837  0.146489  0.641943  -0.358678  -0.900016  0.206532  0.229352  1.35009  1.6676  0.0763447  0.194472  1.12625  1.4675  0.165954  -0.119723  1.17805  1.08553  -0.0408538  0.109849  1.16076  1.15539  
