# Supplementary material
Source: ML conference proceedings conference paper supplement (https://openaccess.thecvf.com/content/ICCV_2017/html/Remelli_Low-Dimensionality_Calibration_Through_ICCV_2017_paper.html)
Supplement: Supplementary file 3 [file Remelli_Low-Dimensionality_Calibration_Through_ICCV_2017_supplemental.zip › additional_material/code/hmodel/data/USER1/8/C.txt]

38
127.236 75.9706 123.888 112.97 72.4864 122.326 91.2462 69.1852 120.656 54.8073 66.3368 115.897 129.356 117.504 132.188 116.135 109.499 129.628 91.4338 97.674 126.784 51.7731 81.2963 118.588 123.297 142.683 146.793 107.791 133.824 142.691 84.8743 121.589 136.099 47.4394 95.5293 126.347 93.925 161.637 152.069 83.7517 150.929 151.475 66.8475 134.535 148.59 35.6931 106.822 139.475 -0.946882 139.077 182.249 -2.43938 125.382 173.795 0.533042 95.9835 159.664 -1.32467 61.4277 134.512 48.6195 61.2064 118.322 45.8929 74.9317 121.46 41.2827 87.179 127.092 31.466 101.82 139.497 24.5157 102.415 142.974 0.050813 54.5444 121.7 6.81287 46.5397 116.729 -1.08752 62.5882 125.896 75.2226 64.9928 122.94 70.0626 87.7677 127.565 62.5337 101.985 134.252 49.7657 111.528 147.067 -1.29196 146.002 186.148 5.40348 90.7887 149.142 -11.6366 55.5879 124.867 3.74089 47.4 118.077 -33.3244 10.1607 112.508 -25.6357 6.06673 109.113 
