# Supplementary material
Source: ML conference proceedings conference paper supplement (https://openaccess.thecvf.com/content/ICCV_2017/html/Remelli_Low-Dimensionality_Calibration_Through_ICCV_2017_paper.html)
Supplement: Supplementary file 3 [file Remelli_Low-Dimensionality_Calibration_Through_ICCV_2017_supplemental.zip › additional_material/code/hmodel/data/USER1/8/T.txt]

29
0.050813  -15.4556  521.7  0.468693  -3.09505  1.04532  -0.000131231  -0.462546  0.197942  0.602983  0.662461  0.412157  -0.0976496  0.0586418  -0.039274  -0.100366  -0.100286  0.125153  -0.00914666  0.0917619  -0.100168  0.0667408  -0.0471968  -0.100297  -0.100402  -0.00655462  -0.00306057  -0.0718709  -0.100155  
