# Supplementary material
Source: ML conference proceedings conference paper supplement (https://openaccess.thecvf.com/content/ICCV_2017/html/Remelli_Low-Dimensionality_Calibration_Through_ICCV_2017_paper.html)
Supplement: Supplementary file 3 [file Remelli_Low-Dimensionality_Calibration_Through_ICCV_2017_supplemental.zip › additional_material/code/hmodel/display/myline.m]

function [] = myline(a, b, color, varargin)

line_width = 2;
if ~isempty(varargin)
    line_width = varargin{1};
end

if length(a) == 3
    line([a(1) b(1)], [a(2) b(2)], [a(3) b(3)], 'lineWidth', line_width, 'color', color);
end

if length(a) == 2
    line([a(1) b(1)], [a(2) b(2)], 'lineWidth', line_width, 'color', color);
end
