# Supplementary material
Source: ML conference proceedings conference paper supplement (https://openaccess.thecvf.com/content/ICCV_2017/html/Remelli_Low-Dimensionality_Calibration_Through_ICCV_2017_paper.html)
Supplement: Supplementary file 3 [file Remelli_Low-Dimensionality_Calibration_Through_ICCV_2017_supplemental.zip › additional_material/code/hmodel/display/mypoint.m]

function [] = mypoint(p, color, varargin)

point_size = 12;
if ~isempty(varargin)
    point_size = varargin{1};
end


if (length(p) == 3)
    scatter3(p(1), p(2), p(3), point_size, color, 'o', 'filled');
end
if (length(p) == 2)
    scatter(p(1), p(2), point_size, color, 'o', 'filled');
end
