# Supplementary material
Source: ML conference proceedings conference paper supplement (https://openaccess.thecvf.com/content/ICCV_2017/html/Remelli_Low-Dimensionality_Calibration_Through_ICCV_2017_paper.html)
Supplement: Supplementary file 3 [file Remelli_Low-Dimensionality_Calibration_Through_ICCV_2017_supplemental.zip › additional_material/code/hmodel/display/mypoints.m]

function mypoints(points, color, varargin)

point_size = 8;
if ~isempty(varargin)
    point_size = varargin{1};
end

if isempty(points), return; end
D = 1;
for i = 1:length(points)
    if ~isempty(points{i})
        D = length(points{i});
        break;
    end
end

if D == 3
    P = zeros(length(points), 3);
    k = 0;
    for i = 1:length(points)
        if ~isempty(points{i})
            k = k + 1;
            P(k, :) = points{i}';
        end
    end
    P = P(1:k, :);
    scatter3(P(:, 1), P(:, 2), P(:, 3), point_size, color, 'filled');
end
if D == 2
    P = zeros(length(points), 2);
    k = 0;
    for i = 1:length(points)
        if ~isempty(points{i})
            k = k + 1;
            P(i, :) = points{i}';
        end
    end
    P = P(1:k, :);
    scatter(P(:, 1), P(:, 2), point_size, color, 'o', 'filled');
end
