# Supplementary material
Source: ML conference proceedings conference paper supplement (https://openaccess.thecvf.com/content/ICCV_2017/html/Remelli_Low-Dimensionality_Calibration_Through_ICCV_2017_paper.html)
Supplement: Supplementary file 3 [file Remelli_Low-Dimensionality_Calibration_Through_ICCV_2017_supplemental.zip › additional_material/code/hmodel/gradient/cross_derivative.m]

function [f, df] = cross_derivative(a, da, b, db)

f = cross(a, b);
df = my_cross(a, db) - my_cross(b, da);
