# Supplementary material
Source: ML conference proceedings conference paper supplement (https://openaccess.thecvf.com/content/ICCV_2017/html/Remelli_Low-Dimensionality_Calibration_Through_ICCV_2017_paper.html)
Supplement: Supplementary file 3 [file Remelli_Low-Dimensionality_Calibration_Through_ICCV_2017_supplemental.zip › additional_material/code/hmodel/gradient/minus_handle.m]

function [f, df] = minus_handle(a, da, arguments)

f = eval(['@(', arguments, ') - feval(a, ', arguments, ')']);
df = eval([' @(', arguments, ') - feval(da, ', arguments, ')']);
