# Supplementary material
Source: ML conference proceedings conference paper supplement (https://openaccess.thecvf.com/content/ICCV_2017/html/Remelli_Low-Dimensionality_Calibration_Through_ICCV_2017_paper.html)
Supplement: Supplementary file 3 [file Remelli_Low-Dimensionality_Calibration_Through_ICCV_2017_supplemental.zip › additional_material/code/hmodel/gradient/my_gradient.m]

function [df] = my_gradient(f, x)

e = 10e-10;

%% If f is a scalar function

if isscalar(f(x))
    
    df = zeros(size(x'));
    
    for i = 1:length(x)
        delta_x = zeros(size(x));
        delta_x(i) = e;
        df(i) = (f(x + delta_x) - f(x - delta_x))/ (2 * e);
    end
    
%% If f is a vector function
    
else
    
    df = zeros(length(f(x)), length(x));
    
    for i = 1:length(x)
        delta_x = zeros(size(x));
        delta_x(i) = e;
        df(:, i) = (f(x + delta_x) - f(x - delta_x))/ (2 * e);
    end
    
end
