# Supplementary material
Source: ML conference proceedings conference paper supplement (https://openaccess.thecvf.com/content/ICCV_2017/html/Remelli_Low-Dimensionality_Calibration_Through_ICCV_2017_paper.html)
Supplement: Supplementary file 3 [file Remelli_Low-Dimensionality_Calibration_Through_ICCV_2017_supplemental.zip › additional_material/code/hmodel/gradient/norm_handle.m]

function [f, df]  = norm_handle(a, da, arguments)

f = eval([' @(', arguments, ') sqrt(feval(a, ', arguments, ')'' * feval(a, ', arguments, ')) ']);
df = eval([' @(', arguments, ') feval(a, ', arguments, ')'' * feval(da, ', arguments, ') / sqrt(feval(a, ', arguments, ')'' * feval(a, ', arguments, ')) ']);
