# Supplementary material
Source: ML conference proceedings conference paper supplement (https://openaccess.thecvf.com/content/ICCV_2017/html/Remelli_Low-Dimensionality_Calibration_Through_ICCV_2017_paper.html)
Supplement: Supplementary file 3 [file Remelli_Low-Dimensionality_Calibration_Through_ICCV_2017_supplemental.zip › additional_material/code/hmodel/gradient/normalize_derivative.m]

function [f, df] = normalize_derivative(a, da)


f = a / sqrt(a' * a);
df = (da * sqrt(a' * a) - a * a' * da / sqrt(a' * a)) /  (a' * a);
