# Supplementary material
Source: ML conference proceedings conference paper supplement (https://openaccess.thecvf.com/content/ICCV_2017/html/Remelli_Low-Dimensionality_Calibration_Through_ICCV_2017_paper.html)
Supplement: Supplementary file 3 [file Remelli_Low-Dimensionality_Calibration_Through_ICCV_2017_supplemental.zip › additional_material/code/hmodel/gradient/product_handle.m]

function [f, df] = product_handle(s, ds, a, da, arguments)

f  = eval(['@(', arguments, ') feval(s, ', arguments, ') * feval(a, ', arguments, ')']);
df = eval(['@(', arguments, ')feval(a, ', arguments, ') * feval(ds, ', arguments, ') + feval(s, ', arguments, ') * feval(da, ', arguments, ')']);
