# Supplementary material
Source: ML conference proceedings conference paper supplement (https://openaccess.thecvf.com/content/ICCV_2017/html/Remelli_Low-Dimensionality_Calibration_Through_ICCV_2017_paper.html)
Supplement: Supplementary file 3 [file Remelli_Low-Dimensionality_Calibration_Through_ICCV_2017_supplemental.zip › additional_material/code/hmodel/gradient/ratio_handle.m]

function [f, df]  = ratio_handle(a, da, b, db, arguments)

f = eval ([' @(', arguments, ') feval(a, ', arguments, ') / feval(b, ', arguments, ')' ]);
df = eval ([' @(', arguments, ') (feval(b, ', arguments, ') * feval(da, ', arguments, ') - feval(a, ', arguments, ') * feval(db, ', arguments, ')) / feval(b, ', arguments, ')^2' ]);
