# Supplementary material
Source: ML conference proceedings conference paper supplement (https://openaccess.thecvf.com/content/ICCV_2017/html/Remelli_Low-Dimensionality_Calibration_Through_ICCV_2017_paper.html)
Supplement: Supplementary file 3 [file Remelli_Low-Dimensionality_Calibration_Through_ICCV_2017_supplemental.zip › additional_material/code/hmodel/gradient/sqrt_handle.m]

function [f, df]  = sqrt_handle(s, ds, arguments)

f = eval(['@(', arguments, ') sqrt(feval(s, ', arguments, '))']);
df = eval(['@(', arguments, ') feval(ds, ', arguments, ') / 2 / sqrt(feval(s, ', arguments, '))']);
