# Supplementary material
Source: ML conference proceedings conference paper supplement (https://openaccess.thecvf.com/content/ICCV_2017/html/Remelli_Low-Dimensionality_Calibration_Through_ICCV_2017_paper.html)
Supplement: Supplementary file 3 [file Remelli_Low-Dimensionality_Calibration_Through_ICCV_2017_supplemental.zip › additional_material/code/hmodel/src/COMPUTE_D2M_ENERGY.m]

function [F, Jtheta, Jbeta, Jr, Jcenters_fingers, Jcenters_palm, Jr_palm, Js_membrane, Jglobal_rotation, Jglobal_translation, Joffset_fold, Jr_fold] = COMPUTE_D2M_ENERGY(hand_model, data_points, model_points, indices, block_indices, reject_back_projections, rigid )

%% prepare hand model
centers = hand_model.palm_wrist_centers;
centers{end+1} = hand_model.fold_center;
%convert segments into centers
for i = 1:length(hand_model.segments)
    finger_segments =  hand_model.segments{i};
    for j = 1:length(finger_segments)
        centers{end+1} = finger_segments{j}.global(1:3, 4);
    end
end

for i = 1:length(hand_model.membrane_centers)
    centers{end+1} = hand_model.membrane_centers{i}; 
end

radii = {};
 for i = 1: length(hand_model.palm_wrist_radii)
    radii{end +1} = hand_model.palm_wrist_radii{i};
 end
radii{end+1} = hand_model.fold_radii;
 
 for i = 1: length(hand_model.finger_radii)
    radii{end +1} = hand_model.finger_radii{i};
 end
 for i = 1: length(hand_model.membrane_radii)
    radii{end +1} = hand_model.membrane_radii{i};
 end
blocks = hand_model.blocks;
D = 3;

%discard back facing points
if(reject_back_projections)
    model_normals = compute_model_normals(centers, radii, blocks, data_points, indices);
    camera_ray = [0; 1; 0];
    for i = 1:length(model_points)
        if isempty(model_normals{i}), continue; end
        if camera_ray' * model_normals{i} > 0
            model_points{i} = [];
        end
    end
end


%% Compute tangent points to wedges
[tangent_gradients] = jacobian_tangent_planes(centers, blocks, radii, {'c1', 'c2', 'c3', 'r1', 'r2', 'r3'});

%% CREATE MATRICES TO STORE JACOBIANS

num_points = length(data_points);

F = zeros( num_points, 1);
Jtheta = zeros( num_points, 20);
Jbeta = zeros( num_points, 16);
Jr = zeros( num_points, 21);
Jcenters_fingers = zeros( num_points, 15 );
Jr_palm = zeros( num_points, length(hand_model.palm_wrist_radii) );
Jcenters_palm = zeros( num_points, 3*length(hand_model.palm_wrist_radii) );
Jr_fold = zeros(num_points, 1);
Joffset_fold = zeros(num_points, 3);
Js_membrane = zeros( num_points, 4 );
Jglobal_rotation = zeros( num_points, 3 );
Jglobal_translation = zeros( num_points, 3 );

%% Compute tangent points
for i = 1:num_points
      
    q = model_points{i};
    p = data_points{i};
    index =  indices{i};
    block_index = block_indices{i};   
    tangent_gradient = tangent_gradients{block_index};
    
    bool_degenerate = false;
    if (~isempty(tangent_gradient))
        bool_degenerate = ~isreal(tangent_gradient.u1);
    end
    
    if isempty(index) || isempty(p) || isempty(q) || bool_degenerate
        continue;
    end  
    
    %check if point belongs to segment, in that case map to segment
    %indices
    [is_on_segment, index_i,index_j, segment_index ] = block_index2segment_id( hand_model,index, block_index );
    
    thumb_correction = 0;
    if (index_i > 1)
       thumb_correction = 1;
    end
    
    %check if point belongs to membrane, in that case map to membrane
    %indices
    [bool_is_on_membrane, is_membrane_center, membrane_index ] = is_on_membrane( hand_model,index, block_index ) ;
    
    n = (p-q)/norm(p-q);
    
    if( ~rigid )
        % check if model point belongs to a segment or not
        if(is_on_segment)

            % take current segment
            segment = hand_model.segments{index_i}{index_j};

            %% COMPUTE JACOBIAN DUE TO THETA

            point_jacobian_theta = zeros(3, 20);

            % loop over all elements of kinematic chain
            for l = 1:length(segment.kinematic_chain)
                % extract joint
                loop_segment_id = segment.kinematic_chain(l);
                % joint center position
                joint_position = hand_model.segments{index_i}{loop_segment_id}.global(1:3, 4);
                % global transform
                T = hand_model.segments{index_i}{loop_segment_id}.global(1:3, 1:3);

                for k = 1: length(hand_model.segments{index_i}{loop_segment_id}.joints_id)
                    joint_id = hand_model.segments{index_i}{loop_segment_id}.joints_id{k};  
                    % joint axis
                    u = hand_model.joints{index_i}{joint_id}.axis;           
                    % transform axis from local to global ref frame
                    v = T * u;

                    switch hand_model.joints{index_i}{joint_id}.type
                        case 'R'
                            point_jacobian_theta(:,  joint_id + (index_i-1)* 4) = cross(v, q - joint_position);
                        case 'T'
                            point_jacobian_theta(:, joint_id + (index_i-1)* 4) = v;
                    end
                end
            end    

            %% COMPUTE JACOBIAN DUE TO BETA

            point_jacobian_beta = zeros(3, 16);
            %default orientation for length increment
            u = [0; 0; 1];

            for l = 1:length(segment.shape_chain)
                                
                %extract segment id on shape chain
                loop_segment_id = segment.shape_chain(l);
                % segment orientation transform
                T = hand_model.segments{index_i}{loop_segment_id}.global(1:3,1:3);
                %retrieve orientation of segment
                v = T * u;       
                %write in our vector 
                if (index_j ~= loop_segment_id)
                    point_jacobian_beta(:, thumb_correction + loop_segment_id + (index_i-1)* 3) = v;
                else
                    if (length(segment_index) == 2)
                        variables = {'c2'};
                        c1 = hand_model.segments{index_i}{index_j}.global(1:3, 4);
                        c2 = hand_model.segments{index_i}{index_j +1}.global(1:3, 4);
                        r1 = hand_model.finger_radii{thumb_correction +index_j + 4*(index_i -1)};
                        r2 = hand_model.finger_radii{thumb_correction +index_j + 1 + 4*(index_i -1)};
                        [~,dq] = jacobian_convsegment(p,c1,c2,r1,r2,variables);
                        point_jacobian_beta(:, thumb_correction + loop_segment_id + (index_i-1)* 3) = dq.dc2 * v;
                    elseif(length(segment_index) == 1 && segment_index(1) == (index_j + 1))
                       variables = {'c1'};
                        c1 = hand_model.segments{index_i}{index_j +1}.global(1:3, 4);
                        r1 = hand_model.finger_radii{thumb_correction + index_j + 1 + 4*(index_i -1)};
                        [~, dq] = jacobian_sphere(p, c1, r1, variables);
                        point_jacobian_beta(:, thumb_correction + loop_segment_id + (index_i-1)* 3) = dq.dc1 * v; 
                    end
                end
            end

            %% COMPUTE JACOBIAN DUE TO RADI

            if length(index) == 1
                variables = {'r1'};
                [~, dq] = jacobian_sphere(p, centers{13 + segment_index + 4*(index_i -1)+thumb_correction}, radii{thumb_correction+ 13 + segment_index + 4*(index_i -1)}, variables);
            end

            if length(index) == 2
                variables = {'r1', 'r2'};
                [~, dq] = jacobian_convsegment(p, centers{13 + index_j  + 4*(index_i -1) +thumb_correction}, centers{13 +index_j + 1 + 4*(index_i -1)+thumb_correction}, radii{thumb_correction+ 13 + index_j + 4*(index_i -1)}, radii{thumb_correction+ 13 + index_j + 1 + 4*(index_i -1)}, variables);
            end

            % PROJECT ALONG NORMAL AND STORE WHAT HAS BEEN COMPUTED   

            Jr(i,thumb_correction+ 4*(index_i -1)+ segment_index(1)) = n'*dq.dr1;
            if length(index) == 2
                Jr(i,thumb_correction+ 4*(index_i -1)+ segment_index(2)) = n'*dq.dr2;
            end

            Jtheta(i, :) = n'*point_jacobian_theta;
            Jbeta(i, :) = n'*point_jacobian_beta;


            T =  hand_model.global_pose;
            T = T(1:3,1:3);

            Jcenters_fingers(i, (3*(index_i -1) +1) : 3*index_i ) = n'*T(1:3,1:3)*eye(3,3);
                  

        elseif(bool_is_on_membrane)
            
                indices_for_centers = [hand_model.palm_wrist_names_map('palm_index'), hand_model.palm_wrist_names_map('palm_middle'), hand_model.palm_wrist_names_map('palm_ring'), hand_model.palm_wrist_names_map('palm_pinky')];

                T = hand_model.global_pose;
                T = T(1:3,1:3);
                
                % determine left and right finger
                [ ~,  ~, full_membrane_index ] = is_on_membrane( hand_model,blocks{block_index}, block_index ) ;
                left_finger_index = min(full_membrane_index(3),min(full_membrane_index(2),full_membrane_index(1)));
                right_finger_index = max(full_membrane_index(3),max(full_membrane_index(2),full_membrane_index(1)));    
                % PREPARE PARAMS TO OCOMPUTE MEMBRANE DERIVATIVE
                c1 = hand_model.segments{left_finger_index}{1}.global(1:3,4);
                c2 = hand_model.segments{right_finger_index}{1}.global(1:3,4);
                %c1 = hand_model.palm_wrist_centers{indices_for_centers(left_finger_index-1)};
                %c2 = hand_model.palm_wrist_centers{indices_for_centers(right_finger_index-1)};                
                beta1 = hand_model.beta{left_finger_index}(1);
                beta2 = hand_model.beta{right_finger_index}(1);
                R1 = hand_model.segments{left_finger_index}{1}.global(1:3,1:3);
                R2 = hand_model.segments{right_finger_index}{1}.global(1:3,1:3);
                r11 = hand_model.finger_radii{1 + 4*( left_finger_index - 1) + 1};
                r12 = hand_model.finger_radii{1 + 4*( left_finger_index - 1) + 2};
                r21 = hand_model.finger_radii{1 + 4*( right_finger_index - 1) + 1};
                r22 = hand_model.finger_radii{1 + 4*( right_finger_index - 1) + 2};
                s1 = hand_model.membrane_position{left_finger_index-1};
                s2 = hand_model.membrane_position{right_finger_index-1};        

                variables = {'c1b','c2b','c1','c2','beta1','beta2','r1','r2','r11','r12','r21','r22','s1','s2','theta11', 'theta12', 'theta21', 'theta22'};

                [dc1b, dc2b,m_dc1, m_dc2, m_dcm1, m_dcm2, m_dc1_r, m_dc2_r,m_dc1b_r, m_dc2b_r, m_dcm1_r, m_dcm2_r ] = jacobian_membrane(hand_model.global_pose(1:3,1:3), c1,c2, beta1, beta2, R1, R2, r11, r12, r21, r22, s1, s2, variables);
                

            % IDENTIFY LEFT AND RIGHT FINGER WE ARE DEALING WITH    
            if (length(index) == 3)

                %% FIGURE OUT WHICH MEMBRANE TRIANGLE TYPE ARE WE LOOKING AT 

                 if (sum(is_membrane_center) == 2)
                    dc1 = m_dc1;
                    dr1 = m_dc1_r;
                    if membrane_index(1) == membrane_index(2)
                        dc2 = m_dcm1;
                        dr2 = m_dcm1_r;
                        dc3 = m_dcm2;
                        dr3 = m_dcm2_r;               
                    else
                        dc3 = m_dcm1;
                        dr3 = m_dcm1_r;
                        dc2 = m_dcm2;
                        dr2 = m_dcm2_r;      
                    end

                 else
                    dc3 = m_dcm2;
                    dr3 = m_dcm2_r;
                    if membrane_index(3) == membrane_index(2)
                        dc2 = m_dc2;
                        dr2 = m_dc2_r;
                        dc1 = m_dc1;
                        dr1 = m_dc1_r;               
                    else
                        dc1 = m_dc2;
                        dr1 = m_dc2_r;
                        dc2 = m_dc1;
                        dr2 = m_dc1_r;     
                    end
                 end  

                variables = {'c1', 'c2', 'c3', 'r1', 'r2', 'r3'};
                v1 = tangent_gradient.v1; v2 = tangent_gradient.v2; v3 = tangent_gradient.v3;
                u1 = tangent_gradient.u1; u2 = tangent_gradient.u2; u3 = tangent_gradient.u3;
                Jv1 = tangent_gradient.Jv1; Jv2 = tangent_gradient.Jv2; Jv3 = tangent_gradient.Jv3;
                Ju1 = tangent_gradient.Ju1; Ju2 = tangent_gradient.Ju2; Ju3 = tangent_gradient.Ju3;
                if (index(1) > 0)
                    [~, dq] = jacobian_convtriangle(p, v1, v2, v3, Jv1, Jv2, Jv3, variables);
                else
                    [~, dq] = jacobian_convtriangle(p, u1, u2, u3, Ju1, Ju2, Ju3, variables);
                end
               
                
                % derivative with respect to finger centers
                Jcenters_fingers(i,(3*(left_finger_index -1) +1) : 3*left_finger_index) =  n'*(dq.dc1*dc1.dc1b + dq.dc2*dc2.dc1b + dq.dc3*dc3.dc1b + dq.dr1*dr1.dc1b + dq.dr2*dr2.dc1b + dq.dr3*dr3.dc1b)*T;
                Jcenters_fingers(i,(3*(right_finger_index -1) +1) : 3*right_finger_index) = n'*(dq.dc1*dc1.dc2b + dq.dc2*dc2.dc2b + dq.dc3*dc3.dc2b + dq.dr1*dr1.dc2b + dq.dr2*dr2.dc2b + dq.dr3*dr3.dc2b)*T;
                % derivative with respect to c1 
                Jcenters_palm(i,(3*(indices_for_centers(left_finger_index-1) -1) +1) : 3*indices_for_centers(left_finger_index-1)) =  n'*(dq.dc1*dc1.dc1 + dq.dc2*dc2.dc1 + dq.dc3*dc3.dc1 + dq.dr1*dr1.dc1 + dq.dr2*dr2.dc1 + dq.dr3*dr3.dc1)*T;
                Jcenters_palm(i,(3*(indices_for_centers(right_finger_index-1) -1) +1) : 3*indices_for_centers(right_finger_index-1)) = n'*(dq.dc1*dc1.dc2 + dq.dc2*dc2.dc2 + dq.dc3*dc3.dc2 + dq.dr1*dr1.dc2 + dq.dr2*dr2.dc2 + dq.dr3*dr3.dc2)*T;                
                % beta derivative
                Jbeta(i, 1 +3*(left_finger_index -1) +1) = n'*(dq.dc1*dc1.dbeta1 + dq.dc2*dc2.dbeta1 + dq.dc3*dc3.dbeta1 + dq.dr1*dr1.dbeta1 + dq.dr2*dr2.dbeta1 + dq.dr3*dr3.dbeta1);
                Jbeta(i, 1 +3*(right_finger_index -1) +1) = n'*(dq.dc1*dc1.dbeta2 + dq.dc2*dc2.dbeta2 + dq.dc3*dc3.dbeta2 + dq.dr1*dr1.dbeta2 + dq.dr2*dr2.dbeta2 + dq.dr3*dr3.dbeta2);
                % radi derivative
                Jr_palm (i, indices_for_centers(left_finger_index-1) ) = n'*(dq.dc1*dc1.dr1 + dq.dc2*dc2.dr1 + dq.dc3*dc3.dr1 + dq.dr1*dr1.dr1 + dq.dr2*dr2.dr1 + dq.dr3*dr3.dr1);
                Jr (i, 1 + 4*(left_finger_index -1) +1  )= n'*(dq.dc1*dc1.dr11 + dq.dc2*dc2.dr11 + dq.dc3*dc3.dr11 + dq.dr1*dr1.dr11 + dq.dr2*dr2.dr11 + dq.dr3*dr3.dr11);
                Jr (i, 1 + 4*(left_finger_index -1) +2  )= n'*(dq.dc1*dc1.dr12 + dq.dc2*dc2.dr12 + dq.dc3*dc3.dr12 + dq.dr1*dr1.dr12 + dq.dr2*dr2.dr12 + dq.dr3*dr3.dr12);
                Jr_palm (i, indices_for_centers(right_finger_index-1) ) = n'*(dq.dc1*dc1.dr2 + dq.dc2*dc2.dr2 + dq.dc3*dc3.dr2 + dq.dr1*dr1.dr2 + dq.dr2*dr2.dr2 + dq.dr3*dr3.dr2);
                Jr (i, 1 +4*(right_finger_index -1) +1  )  = n'*(dq.dc1*dc1.dr21 + dq.dc2*dc2.dr21 + dq.dc3*dc3.dr21 + dq.dr1*dr1.dr21 + dq.dr2*dr2.dr21 + dq.dr3*dr3.dr21);
                Jr (i, 1 +4*(right_finger_index -1) +2  )  = n'*(dq.dc1*dc1.dr22 + dq.dc2*dc2.dr22 + dq.dc3*dc3.dr22 + dq.dr1*dr1.dr22 + dq.dr2*dr2.dr22 + dq.dr3*dr3.dr22);
                % other stuff
                Jtheta(i, 1 + (left_finger_index-1)* 4) = n'*(dq.dc1*dc1.dtheta11 + dq.dc2*dc2.dtheta11 + dq.dc3*dc3.dtheta11 + dq.dr1*dr1.dtheta11 + dq.dr2*dr2.dtheta11 + dq.dr3*dr3.dtheta11);
                Jtheta(i, 2 + (left_finger_index-1)* 4) = n'*(dq.dc1*dc1.dtheta12 + dq.dc2*dc2.dtheta12 + dq.dc3*dc3.dtheta12 + dq.dr1*dr1.dtheta12 + dq.dr2*dr2.dtheta12 + dq.dr3*dr3.dtheta12);
                Jtheta(i, 1 + (right_finger_index-1)* 4) = n'*(dq.dc1*dc1.dtheta21 + dq.dc2*dc2.dtheta21 + dq.dc3*dc3.dtheta21 + dq.dr1*dr1.dtheta21 + dq.dr2*dr2.dtheta21 + dq.dr3*dr3.dtheta21);
                Jtheta(i, 2 + (right_finger_index-1)* 4) = n'*(dq.dc1*dc1.dtheta22 + dq.dc2*dc2.dtheta22 + dq.dc3*dc3.dtheta22 + dq.dr1*dr1.dtheta22 + dq.dr2*dr2.dtheta22 + dq.dr3*dr3.dtheta22);
                Js_membrane (i, left_finger_index - 1) = n'*(dq.dc1*dc1.ds1 + dq.dc2*dc2.ds1 + dq.dc3*dc3.ds1 + dq.dr1*dr1.ds1 + dq.dr2*dr2.ds1 + dq.dr3*dr3.ds1);
                Js_membrane (i, right_finger_index - 1) = n'*(dq.dc1*dc1.ds2 + dq.dc2*dc2.ds2 + dq.dc3*dc3.ds2 + dq.dr1*dr1.ds2 + dq.dr2*dr2.ds2 + dq.dr3*dr3.ds2);           

            end

            if length(index) == 2

                if (sum(is_membrane_center) == 2)
                    if membrane_index(1) == left_finger_index
                        dc1 = m_dcm1;
                        dr1 = m_dcm1_r;
                        dc2 = m_dcm2;
                        dr2 = m_dcm2_r;               
                    else
                        dc2 = m_dcm1;
                        dr2 = m_dcm1_r;
                        dc1 = m_dcm2;
                        dr1 = m_dcm2_r;       
                    end  
                elseif (sum(is_membrane_center) == 0)
                    if membrane_index(1) == left_finger_index
                        dc1 = m_dc1;
                        dr1 = m_dc1_r;
                        dc2 = m_dc2;
                        dr2 = m_dc2_r;               
                    else
                        dc2 = m_dc1;
                        dr2 = m_dc1_r;
                        dc1 = m_dc2;
                        dr1 = m_dc2_r;       
                    end    
                else
                    if membrane_index(1) == left_finger_index && membrane_index(2) == left_finger_index
                       dc1 = m_dc1;
                       dr1 = m_dc1_r;
                       dc2 = m_dcm1;
                       dr2 = m_dcm1_r;
                    elseif membrane_index(1) == right_finger_index && membrane_index(2) == right_finger_index
                       dc1 = m_dc2;
                       dr1 = m_dc2_r;
                       dc2 = m_dcm2;
                       dr2 = m_dcm2_r;
                    else
                       dc1 = m_dc1;
                       dr1 = m_dc1_r;
                       dc2 = m_dcm2;
                       dr2 = m_dcm2_r; 
                    end
                end
                variables = {'c1', 'c2', 'r1', 'r2'};
                [q, dq] = jacobian_convsegment(p, centers{index(1)}, centers{index(2)}, radii{index(1)}, radii{index(2)}, variables);

                % derivative with respect to finger centers
                Jcenters_fingers(i,(3*(left_finger_index -1) +1) : 3*left_finger_index) =  n'*(dq.dc1*dc1.dc1b + dq.dc2*dc2.dc1b  + dq.dr1*dr1.dc1b + dq.dr2*dr2.dc1b )*T;
                Jcenters_fingers(i,(3*(right_finger_index -1) +1) : 3*right_finger_index) = n'*(dq.dc1*dc1.dc2b + dq.dc2*dc2.dc2b  + dq.dr1*dr1.dc2b + dq.dr2*dr2.dc2b )*T;
                % derivative with respect to c1 
                Jcenters_palm(i,(3*(indices_for_centers(left_finger_index-1) -1) +1) : 3*indices_for_centers(left_finger_index-1)) =  n'*(dq.dc1*dc1.dc1 + dq.dc2*dc2.dc1 + dq.dr1*dr1.dc1 + dq.dr2*dr2.dc1 )*T;
                Jcenters_palm(i,(3*(indices_for_centers(right_finger_index-1) -1) +1) : 3*indices_for_centers(right_finger_index-1)) = n'*(dq.dc1*dc1.dc2 + dq.dc2*dc2.dc2 +  dq.dr1*dr1.dc2 + dq.dr2*dr2.dc2 )*T;                
                % beta derivative
                Jbeta(i, 1 +3*(left_finger_index -1) +1) = n'*(dq.dc1*dc1.dbeta1 + dq.dc2*dc2.dbeta1  + dq.dr1*dr1.dbeta1 + dq.dr2*dr2.dbeta1 );
                Jbeta(i, 1 +3*(right_finger_index -1) +1) = n'*(dq.dc1*dc1.dbeta2 + dq.dc2*dc2.dbeta2  + dq.dr1*dr1.dbeta2 + dq.dr2*dr2.dbeta2 );
                % radi derivative
                Jr_palm (i, indices_for_centers(left_finger_index-1) ) = n'*(dq.dc1*dc1.dr1 + dq.dc2*dc2.dr1  + dq.dr1*dr1.dr1 + dq.dr2*dr2.dr1);
                Jr (i, 1 + 4*(left_finger_index -1) +1  )= n'*(dq.dc1*dc1.dr11 + dq.dc2*dc2.dr11  + dq.dr1*dr1.dr11 + dq.dr2*dr2.dr11 );
                Jr (i, 1 + 4*(left_finger_index -1) +2  )= n'*(dq.dc1*dc1.dr12 + dq.dc2*dc2.dr12 + dq.dr1*dr1.dr12 + dq.dr2*dr2.dr12 );
                Jr_palm (i, indices_for_centers(right_finger_index-1) ) = n'*(dq.dc1*dc1.dr2 + dq.dc2*dc2.dr2  + dq.dr1*dr1.dr2 + dq.dr2*dr2.dr2 );
                Jr (i, 1 +4*(right_finger_index -1) +1  )  = n'*(dq.dc1*dc1.dr21 + dq.dc2*dc2.dr21 + dq.dr1*dr1.dr21 + dq.dr2*dr2.dr21 );
                Jr (i, 1 +4*(right_finger_index -1) +2  )  = n'*(dq.dc1*dc1.dr22 + dq.dc2*dc2.dr22  + dq.dr1*dr1.dr22 + dq.dr2*dr2.dr22 );
                % other stuff
                Jtheta(i, 1 + (left_finger_index-1)* 4) = n'*(dq.dc1*dc1.dtheta11 + dq.dc2*dc2.dtheta11  + dq.dr1*dr1.dtheta11 + dq.dr2*dr2.dtheta11 );
                Jtheta(i, 2 + (left_finger_index-1)* 4) = n'*(dq.dc1*dc1.dtheta12 + dq.dc2*dc2.dtheta12  + dq.dr1*dr1.dtheta12 + dq.dr2*dr2.dtheta12 );
                Jtheta(i, 1 + (right_finger_index-1)* 4) = n'*(dq.dc1*dc1.dtheta21 + dq.dc2*dc2.dtheta21  + dq.dr1*dr1.dtheta21 + dq.dr2*dr2.dtheta21 );
                Jtheta(i, 2 + (right_finger_index-1)* 4) = n'*(dq.dc1*dc1.dtheta22 + dq.dc2*dc2.dtheta22  + dq.dr1*dr1.dtheta22 + dq.dr2*dr2.dtheta22 );
                Js_membrane (i, left_finger_index - 1) = n'*(dq.dc1*dc1.ds1 + dq.dc2*dc2.ds1  + dq.dr1*dr1.ds1 + dq.dr2*dr2.ds1 );
                Js_membrane (i, right_finger_index - 1) = n'*(dq.dc1*dc1.ds2 + dq.dc2*dc2.ds2  + dq.dr1*dr1.ds2 + dq.dr2*dr2.ds2 );           

            end


            if length(index) == 1
                if(is_membrane_center == 1 && membrane_index == left_finger_index)
                    dc1 = m_dcm1;
                    dr1 = m_dcm1_r;
                elseif (is_membrane_center == 1 && membrane_index == right_finger_index)
                    dc1 = m_dcm2;
                    dr1 = m_dcm2_r;
                elseif (is_membrane_center == 0 && membrane_index == right_finger_index)
                    dc1 = m_dc2;
                    dr1 = m_dc2_r;
                else
                    dc1 = m_dc1;
                    dr1 = m_dc1_r;

                end

                variables = {'c1', 'r1'};
                [q, dq] = jacobian_sphere(p, centers{index(1)}, radii{index(1)}, variables);
                
                
                % derivative with respect to finger centers
                Jcenters_fingers(i,(3*(left_finger_index -1) +1) : 3*left_finger_index) =  n'*(dq.dc1*dc1.dc1b + dq.dr1*dr1.dc1b )*T;
                Jcenters_fingers(i,(3*(right_finger_index -1) +1) : 3*right_finger_index) = n'*(dq.dc1*dc1.dc2b + dq.dr1*dr1.dc2b )*T;
                % derivative with respect to c1 
                Jcenters_palm(i,(3*(indices_for_centers(left_finger_index-1) -1) +1) : 3*indices_for_centers(left_finger_index-1)) =  n'*(dq.dc1*dc1.dc1 +  dq.dr1*dr1.dc1 )*T;
                Jcenters_palm(i,(3*(indices_for_centers(right_finger_index-1) -1) +1) : 3*indices_for_centers(right_finger_index-1)) = n'*(dq.dc1*dc1.dc2  + dq.dr1*dr1.dc2 )*T;                
                % beta derivative
                Jbeta(i, 1 +3*(left_finger_index -1) +1) = n'*(dq.dc1*dc1.dbeta1 +  dq.dr1*dr1.dbeta1 );
                Jbeta(i, 1 +3*(right_finger_index -1) +1) = n'*(dq.dc1*dc1.dbeta2 + dq.dr1*dr1.dbeta2 );
                % radi derivative
                Jr_palm (i, indices_for_centers(left_finger_index-1) ) = n'*(dq.dc1*dc1.dr1  + dq.dr1*dr1.dr1 );
                Jr (i, 1 + 4*(left_finger_index -1) +1  )= n'*(dq.dc1*dc1.dr11 + dq.dr1*dr1.dr11 );
                Jr (i, 1 + 4*(left_finger_index -1) +2  )= n'*(dq.dc1*dc1.dr12  + dq.dr1*dr1.dr12 );
                Jr_palm (i, indices_for_centers(right_finger_index-1) ) = n'*(dq.dc1*dc1.dr2  + dq.dr1*dr1.dr2 );
                Jr (i, 1 +4*(right_finger_index -1) +1  )  = n'*(dq.dc1*dc1.dr21 + dq.dr1*dr1.dr21 );
                Jr (i, 1 +4*(right_finger_index -1) +2  )  = n'*(dq.dc1*dc1.dr22  + dq.dr1*dr1.dr22 );
                % other stuff
                Jtheta(i, 1 + (left_finger_index-1)* 4) = n'*(dq.dc1*dc1.dtheta11  + dq.dr1*dr1.dtheta11  );
                Jtheta(i, 2 + (left_finger_index-1)* 4) = n'*(dq.dc1*dc1.dtheta12 + dq.dr1*dr1.dtheta12 );
                Jtheta(i, 1 + (right_finger_index-1)* 4) = n'*(dq.dc1*dc1.dtheta21 + dq.dr1*dr1.dtheta21 );
                Jtheta(i, 2 + (right_finger_index-1)* 4) = n'*(dq.dc1*dc1.dtheta22 + dq.dr1*dr1.dtheta22);
                Js_membrane (i, left_finger_index - 1) = n'*(dq.dc1*dc1.ds1  + dq.dr1*dr1.ds1 );
                Js_membrane (i, right_finger_index - 1) = n'*(dq.dc1*dc1.ds2 + dq.dr1*dr1.ds2 );           

            end

        else
                
        % then we are working with the old parametrization    
        if length(index) == 1
            variables = {'c1', 'r1'};
            [q, dq] = jacobian_sphere(p, centers{index(1)}, radii{index(1)}, variables);

        end
        if length(index) == 2
            variables = {'c1', 'c2', 'r1', 'r2'};
            [q, dq] = jacobian_convsegment(p, centers{index(1)}, centers{index(2)}, radii{index(1)}, radii{index(2)}, variables);
        end
        if length(index) == 3
            variables = {'c1', 'c2', 'c3', 'r1', 'r2', 'r3'};
            v1 = tangent_gradient.v1; v2 = tangent_gradient.v2; v3 = tangent_gradient.v3;
            u1 = tangent_gradient.u1; u2 = tangent_gradient.u2; u3 = tangent_gradient.u3;
            Jv1 = tangent_gradient.Jv1; Jv2 = tangent_gradient.Jv2; Jv3 = tangent_gradient.Jv3;
            Ju1 = tangent_gradient.Ju1; Ju2 = tangent_gradient.Ju2; Ju3 = tangent_gradient.Ju3;
            if (index(1) > 0)
                [~, dq] = jacobian_convtriangle(p, v1, v2, v3, Jv1, Jv2, Jv3, variables);
            else
                [~, dq] = jacobian_convtriangle(p, u1, u2, u3, Ju1, Ju2, Ju3, variables);
            end
        end

        T =  hand_model.global_pose;
        T = T(1:3,1:3);    
        
        if(block_index == 9 )
            % this is the block having two centers belong to a segment
            if length(index) == 1
                if(index(1) == 13)
                    Joffset_fold(i, 1:3) = n'*dq.dc1*hand_model.segments{1}{1}.global(1:3,1:3);
                    Jr_fold(i, 1) = n'*dq.dr1;
                    Jtheta(i,1) = Jtheta(i,1)+ n'*dq.dc1*cross(R*[1; 0; 0], centers{13} - centers{14});
                    Jtheta(i,2) = Jtheta(i,2)+ n'*dq.dc1*cross(R*[0; 1; 0], centers{13} - centers{14});
                    Jcenters_fingers(i, 1:3) = n'*dq.dc1*T;
                elseif(index(1) == 14)
                    Jcenters_fingers(i, 1:3) = n'*dq.dc1*T;
                    Jr(i, 1) = n'*dq.dr1;
                elseif(index(1) == 15)
                    Jcenters_fingers(i, 1:3) = n'*dq.dc1*T;
                    Jr(i, 2) = n'*dq.dr1;
                    R = hand_model.segments{1}{1}.global(1:3,1:3);
                    Jtheta(i,1) = Jtheta(i,1)+ n'*cross(R*[1; 0; 0], q - centers{14});
                    Jtheta(i,2) = Jtheta(i,2)+ n'*cross(R*[0; 1; 0], q - centers{14});
                    Jbeta(i,1) = n'*dq.dc1*R*[0; 0; 1];                   
                end

        
            elseif length(index) == 2
                
                if(index(1) == 13)
                    Joffset_fold(i, 1:3) = n'*dq.dc1*hand_model.segments{1}{1}.global(1:3,1:3);
                    Jr_fold(i, 1) = n'*dq.dr1;
                    Jtheta(i,1) = Jtheta(i,1)+ n'*dq.dc1*cross(R*[1; 0; 0], centers{13} - centers{14});
                    Jtheta(i,2) = Jtheta(i,2)+ n'*dq.dc1*cross(R*[0; 1; 0], centers{13} - centers{14});
                    Jcenters_fingers(i, 1:3) =Jcenters_fingers(i, 1:3) + n'*dq.dc1*T;
                elseif(index(1) == 14)
                    Jcenters_fingers(i, 1:3) = Jcenters_fingers(i, 1:3) + n'*dq.dc1*T;
                    Jr(i, 1) = n'*dq.dr1;
                elseif(index(1) == 15)
                    Jcenters_fingers(i, 1:3) =Jcenters_fingers(i, 1:3) + n'*dq.dc1*T;
                    Jr(i, 2) = n'*dq.dr1;
                    R = hand_model.segments{1}{1}.global(1:3,1:3);
                    Jtheta(i,1) = Jtheta(i,1)+n'*dq.dc1*cross(R*[1; 0; 0], centers{15} - centers{14});
                    Jtheta(i,2) = Jtheta(i,2)+ n'*dq.dc1*cross(R*[0; 1; 0], centers{15} - centers{14});
                    Jbeta(i,1) = n'*dq.dc1*R*[0; 0; 1];                   
                end

                if(index(2) == 13)
                    Joffset_fold(i, 1:3) = n'*dq.dc2*hand_model.segments{1}{1}.global(1:3,1:3);
                    Jr_fold(i, 1) = n'*dq.dr2;
                    Jtheta(i,1) = Jtheta(i,1)+ n'*dq.dc2*cross(R*[1; 0; 0], centers{13} - centers{14});
                    Jtheta(i,2) = Jtheta(i,2)+ n'*dq.dc2*cross(R*[0; 1; 0], centers{13} - centers{14});
                    Jcenters_fingers(i, 1:3) = Jcenters_fingers(i, 1:3) + n'*dq.dc2*T;
                elseif(index(2) == 14)
                    Jcenters_fingers(i, 1:3) = Jcenters_fingers(i, 1:3) + n'*dq.dc2*T;
                    Jr(i, 1) = n'*dq.dr2;
                elseif(index(2) == 15)
                    Jcenters_fingers(i, 1:3) = Jcenters_fingers(i, 1:3) + n'*dq.dc2*T;
                    Jr(i, 2) = n'*dq.dr2;
                    R = hand_model.segments{1}{1}.global(1:3,1:3);
                    Jtheta(i,1) = Jtheta(i,1)+ n'*dq.dc2*cross(R*[1; 0; 0], centers{15} - centers{14});
                    Jtheta(i,2) = Jtheta(i,2)+ n'*dq.dc2*cross(R*[0; 1; 0], centers{15} - centers{14});
                    Jbeta(i,1) = n'*dq.dc2*R*[0; 0; 1];                   
                end


        
            elseif length(index) == 3
                
                index = abs(index);
                
                if(index(1) == 13)
                    Joffset_fold(i, 1:3) = n'*dq.dc1*hand_model.segments{1}{1}.global(1:3,1:3);
                    Jr_fold(i, 1) = n'*dq.dr1;
                    Jtheta(i,1) = Jtheta(i,1)+ n'*dq.dc1*cross(R*[1; 0; 0], centers{13} - centers{14});
                    Jtheta(i,2) = Jtheta(i,2)+n'*dq.dc1*cross(R*[0; 1; 0], centers{13} - centers{14});
                    Jcenters_fingers(i, 1:3) = Jcenters_fingers(i, 1:3) + n'*dq.dc1*T;
                elseif(index(1) == 14)
                    Jcenters_fingers(i, 1:3) = Jcenters_fingers(i, 1:3) + n'*dq.dc1*T;
                    Jr(i, 1) = n'*dq.dr1;
                elseif(index(1) == 15)
                    Jcenters_fingers(i, 1:3) = Jcenters_fingers(i, 1:3) + n'*dq.dc1*T;
                    Jr(i, 2) = n'*dq.dr1;
                    R = hand_model.segments{1}{1}.global(1:3,1:3);
                    Jtheta(i,1) = Jtheta(i,1)+ n'*dq.dc1*cross(R*[1; 0; 0], centers{15} - centers{14});
                    Jtheta(i,2) = Jtheta(i,2) + n'*dq.dc1*cross(R*[0; 1; 0], centers{15} - centers{14});
                    Jbeta(i,1) = n'*dq.dc1*R*[0; 0; 1];                   
                end

                if(index(2) == 13)
                    Joffset_fold(i, 1:3) = n'*dq.dc2*hand_model.segments{1}{1}.global(1:3,1:3);
                    Jr_fold(i, 1) = n'*dq.dr2;
                    Jtheta(i,1) = Jtheta(i,1)+ n'*dq.dc2*cross(R*[1; 0; 0], centers{13} - centers{14});
                    Jtheta(i,2) = Jtheta(i,2)+ n'*dq.dc2*cross(R*[0; 1; 0], centers{13} - centers{14});
                    Jcenters_fingers(i, 1:3) = Jcenters_fingers(i, 1:3) + n'*dq.dc2*T;
                elseif(index(2) == 14)
                    Jcenters_fingers(i, 1:3) = Jcenters_fingers(i, 1:3) + n'*dq.dc2*T;
                    Jr(i, 1) = n'*dq.dr2;
                elseif(index(2) == 15)
                    Jcenters_fingers(i, 1:3) = Jcenters_fingers(i, 1:3) + n'*dq.dc2*T;
                    Jr(i, 2) = n'*dq.dr2;
                    R = hand_model.segments{1}{1}.global(1:3,1:3);
                    Jtheta(i,1) = Jtheta(i,1)+ n'*dq.dc2*cross(R*[1; 0; 0], centers{15} - centers{14});
                    Jtheta(i,2) = Jtheta(i,2)+ n'*dq.dc2*cross(R*[0; 1; 0], centers{15} - centers{14});
                    Jbeta(i,1) = n'*dq.dc2*R*[0; 0; 1];                   
                end
                
                
                if(index(3) == 13)
                    Joffset_fold(i, 1:3) = n'*dq.dc3*hand_model.segments{1}{1}.global(1:3,1:3);
                    Jr_fold(i, 1) = n'*dq.dr3;
                    Jtheta(i,1) = Jtheta(i,1)+ n'*dq.dc3*cross(R*[1; 0; 0], centers{13} - centers{14});
                    Jtheta(i,2) = Jtheta(i,2)+ n'*dq.dc3*cross(R*[0; 1; 0], centers{13} - centers{14});
                    Jcenters_fingers(i, 1:3) = Jcenters_fingers(i, 1:3)  + n'*dq.dc3*T;
                elseif(index(3) == 14)
                    Jcenters_fingers(i, 1:3) = Jcenters_fingers(i, 1:3)  + n'*dq.dc3*T;
                    Jr(i, 1) = n'*dq.dr3;
                elseif(index(3) == 15)
                    Jcenters_fingers(i, 1:3) = Jcenters_fingers(i, 1:3)  + n'*dq.dc3*T;
                    Jr(i, 2) = n'*dq.dr3;
                    R = hand_model.segments{1}{1}.global(1:3,1:3);
                    Jtheta(i,1) = Jtheta(i,1)+ n'*dq.dc3*cross(R*[1; 0; 0], centers{15} - centers{14});
                    Jtheta(i,2) =Jtheta(i,2)+ n'*dq.dc3*cross(R*[0; 1; 0], centers{15} - centers{14});
                    Jbeta(i,1) = n'*dq.dc3*R*[0; 0; 1];                   
                end
            end
                     
        else
            % then we are dealing with the standard case
          

        R = hand_model.segments{1}{1}.global(1:3,1:3);
        % PROJECT ALONG NORMAL AND STORE WHAT HAS BEEN COMPUTED      
        if length(index) == 1
                if(index(1) < 13)
                    Jcenters_palm(i, D * index(1) - D + 1:D * index(1)) = n'*dq.dc1*T;
                    Jr_palm(i, index(1)) = n'*dq.dr1;
                elseif(index(1)== 14)
                    Jcenters_fingers(i, 1:3) =Jcenters_fingers(i, 1:3)+ n'*dq.dc1*T;
                    Jr(i, 1) = n'*dq.dr1;
                else
                    Joffset_fold(i, 1:3) = n'*dq.dc1*hand_model.segments{1}{1}.global(1:3,1:3);
                    Jr_fold(i, 1) = n'*dq.dr1;
                    Jtheta(i,1) = n'*dq.dc1*cross(R*[1; 0; 0], centers{13} - centers{14});
                    Jtheta(i,2) = n'*dq.dc1*cross(R*[0; 1; 0], centers{13} - centers{14});
                    Jcenters_fingers(i, 1:3) =Jcenters_fingers(i, 1:3)+ n'*dq.dc1*T;
                end

        end
        if length(index) == 2
                if(index(1) < 13)
                    Jcenters_palm(i, D * index(1) - D + 1:D * index(1)) = n'*dq.dc1*T;
                    Jr_palm(i, index(1)) = n'*dq.dr1;
                elseif(index(1)== 14)
                    Jcenters_fingers(i, 1:3) = Jcenters_fingers(i, 1:3)+ n'*dq.dc1*T;
                    Jr(i, 1) = n'*dq.dr1;
                else
                    Joffset_fold(i, 1:3) = n'*dq.dc1*hand_model.segments{1}{1}.global(1:3,1:3);
                    Jr_fold(i, 1) = n'*dq.dr1;
                    Jtheta(i,1) = n'*dq.dc1*cross(R*[1; 0; 0], centers{13} - centers{14});
                    Jtheta(i,2) = n'*dq.dc1*cross(R*[0; 1; 0], centers{13} - centers{14});
                    Jcenters_fingers(i, 1:3) = Jcenters_fingers(i, 1:3)+ n'*dq.dc1*T;
                end

                if(index(2) < 13)    
                    Jcenters_palm(i, D * index(2) - D + 1:D * index(2)) = n'*dq.dc2*T;                
                    Jr_palm(i, index(2)) = n'*dq.dr2;
                elseif(index(2)== 14)
                    Jcenters_fingers(i, 1:3) =Jcenters_fingers(i, 1:3)+ n'*dq.dc2*T;
                    Jr(i, 1) = n'*dq.dr2;
                else
                    Joffset_fold(i, 1:3) = n'*dq.dc2*hand_model.segments{1}{1}.global(1:3,1:3);
                    Jr_fold(i, 1) = n'*dq.dr2;
                    Jtheta(i,1) = n'*dq.dc2*cross(R*[1; 0; 0], centers{13} - centers{14});
                    Jtheta(i,2) = n'*dq.dc2*cross(R*[0; 1; 0], centers{13} - centers{14});
                    Jcenters_fingers(i, 1:3) =Jcenters_fingers(i, 1:3)+ n'*dq.dc2*T;
                end


        end
        if length(index) == 3
                index = abs(index);
                if(index(1) < 13)
                    Jcenters_palm(i, D * index(1) - D + 1:D * index(1)) = n'*dq.dc1*T;
                    Jr_palm(i, index(1)) = n'*dq.dr1;
                elseif(index(1)== 14)
                    Jcenters_fingers(i, 1:3) =Jcenters_fingers(i, 1:3)+ n'*dq.dc1*T;
                    Jr(i, 1) = n'*dq.dr1;
                else
                    Joffset_fold(i, 1:3) = n'*dq.dc1*hand_model.segments{1}{1}.global(1:3,1:3);
                    Jr_fold(i, 1) = n'*dq.dr1;
                    Jtheta(i,1) = n'*dq.dc1*cross(R*[1; 0; 0], centers{13} - centers{14});
                    Jtheta(i,2) = n'*dq.dc1*cross(R*[0; 1; 0], centers{13} - centers{14});
                    Jcenters_fingers(i, 1:3) =Jcenters_fingers(i, 1:3)+ n'*dq.dc1*T;
                end

                if(index(2) < 13)
                    Jcenters_palm(i, D * index(2) - D + 1:D * index(2)) = n'*dq.dc2*T;
                    Jr_palm(i, index(2)) = n'*dq.dr2;
                elseif(index(2)== 14)
                    Jcenters_fingers(i, 1:3) =Jcenters_fingers(i, 1:3)+ n'*dq.dc2*T;
                    Jr(i, 1) = n'*dq.dr2;
                else
                    Joffset_fold(i, 1:3) = n'*dq.dc2*hand_model.segments{1}{1}.global(1:3,1:3);
                    Jr_fold(i, 1) = n'*dq.dr2;
                    Jtheta(i,1) = n'*dq.dc2*cross(R*[1; 0; 0], centers{13} - centers{14});
                    Jtheta(i,2) = n'*dq.dc2*cross(R*[0; 1; 0], centers{13} - centers{14});
                    Jcenters_fingers(i, 1:3) =Jcenters_fingers(i, 1:3)+ n'*dq.dc2*T;
                end
                
                if(index(3) < 13)
                    Jcenters_palm(i, D * index(3) - D + 1:D * index(3)) = n'*dq.dc3*T;            
                    Jr_palm(i, index(3)) = n'*dq.dr3;
                elseif(index(3) == 14)
                    Jcenters_fingers(i, 1:3) =Jcenters_fingers(i, 1:3)+ n'*dq.dc3*T;
                    Jr(i, 1) = n'*dq.dr3;
                else
                    Joffset_fold(i, 1:3) = n'*dq.dc3*hand_model.segments{1}{1}.global(1:3,1:3);
                    Jr_fold(i, 1) = n'*dq.dr3;
                    Jtheta(i,1) = n'*dq.dc3*cross(R*[1; 0; 0], centers{13} - centers{14});
                    Jtheta(i,2) = n'*dq.dc3*cross(R*[0; 1; 0], centers{13} - centers{14});
                    Jcenters_fingers(i, 1:3) =Jcenters_fingers(i, 1:3)+ n'*dq.dc3*T;
                end
        end

        end
    end
    
    end
    
    % PROJECT RHS ALONG NORMAL
    Jglobal_rotation(i,:) = n'*[ cross([1;0;0], q), cross([0;1;0], q), cross([0;0;1], q)];
    Jglobal_translation(i,:) = n'*eye(3);
    F(i) = n'*(p-q);    
end
