# Supplementary material
Source: ML conference proceedings conference paper supplement (https://openaccess.thecvf.com/content/ICCV_2017/html/Remelli_Low-Dimensionality_Calibration_Through_ICCV_2017_paper.html)
Supplement: Supplementary file 3 [file Remelli_Low-Dimensionality_Calibration_Through_ICCV_2017_supplemental.zip › additional_material/code/hmodel/src/generate_fingers.m]

function [segments, joints, fingers_name_map] = generate_fingers(beta,base_centers,finger_names)
%UNTITLED2 Summary of this function goes here
%   Detailed explanation goes here
finger_indices = {}; 
segments = {};
joints = {};

for i = 1 : length(beta)
    if i == 1
        [segments{i}, joints{i}] = segments_and_joints(beta{i},base_centers{i},true);  
    else
        [segments{i}, joints{i}] = segments_and_joints(beta{i},base_centers{i},false); 
    end    
    finger_indices{i} = i;
end

fingers_name_map = containers.Map( finger_names, finger_indices);
