# Supplementary material
Source: ML conference proceedings conference paper supplement (https://openaccess.thecvf.com/content/ICCV_2017/html/Remelli_Low-Dimensionality_Calibration_Through_ICCV_2017_paper.html)
Supplement: Supplementary file 3 [file Remelli_Low-Dimensionality_Calibration_Through_ICCV_2017_supplemental.zip › additional_material/code/hmodel/src/pose_NEW.m]

function [segments] = pose_NEW(segments, joints, theta, delta_center, global_pose)

% add a zero at the end of the vector so that we have 1 to 1 matching
% joints-theta
theta = [theta; 0];
if(length(joints) == 6)
    theta = [theta; 0];
end


segments{1}.local(1:3,4) = segments{1}.local(1:3,4) + delta_center;

%% Pose segments
% loop over joints
for i = 1:length(joints)
    % take current segment
    segment = segments{joints{i}.segment_id};
    % initialize transform 
    T = [];
    % discriminate between roational and translational joint
    switch joints{i}.type
        case 'R'
            % makehgttransform gives us global tranform, convert it to
            % local frame of reference using local matrix property
            T = segment.local * makehgtform('axisrotate', joints{i}.axis, theta(i));
        case 'T'
            % makehgttransform gives us global tranform, convert it to
            % local frame of reference using local matrix property
            T = segment.local * makehgtform('translate', joints{i}.axis * theta(i));
    end 
    
    if (segment.parent_id > 0 )   
        % update local to new local tranform
        segment.local = T;
        % set global tranform to global of parents times local
        segment.global = segments{segment.parent_id}.global * T;   
    else
        segment.local = T;
        segment.global = global_pose* T;
    end
    
    % store new oriented segment 
    segments{joints{i}.segment_id} = segment;
end
