# Supplementary material
Source: ML conference proceedings conference paper supplement (https://openaccess.thecvf.com/content/ICCV_2017/html/Remelli_Low-Dimensionality_Calibration_Through_ICCV_2017_paper.html)
Supplement: Supplementary file 3 [file Remelli_Low-Dimensionality_Calibration_Through_ICCV_2017_supplemental.zip › additional_material/code/hmodel/src/project_point_on_line.m]

function [q] = project_point_on_line(p, c1, c2)
u = c2 - c1;
v = p - c1;

alpha = u' * v / (u' * u);
q = c1 + alpha * u;
