# Supplementary material
Source: ML conference proceedings conference paper supplement (https://openaccess.thecvf.com/content/ICCV_2017/html/Remelli_Low-Dimensionality_Calibration_Through_ICCV_2017_paper.html)
Supplement: Supplementary file 3 [file Remelli_Low-Dimensionality_Calibration_Through_ICCV_2017_supplemental.zip › additional_material/code/hmodel/src/projection_sphere.m]

function [index, q, s, is_inside] = projection_sphere(p, c, r, index)

s = c;
q =  c + r * (p - c) / norm(p - c);

%% Cheek is inside or outside
if  norm(p - s) - norm(q - s) > 10e-7 || abs(norm(p - s) - norm(q - s)) < 10e-10
    is_inside = false;
else
    is_inside = true;
end
