# Supplementary material
Source: ML conference proceedings conference paper supplement (https://openaccess.thecvf.com/content/ICCV_2017/html/Remelli_Low-Dimensionality_Calibration_Through_ICCV_2017_paper.html)
Supplement: Supplementary file 3 [file Remelli_Low-Dimensionality_Calibration_Through_ICCV_2017_supplemental.zip › additional_material/code/hmodel/src/shape.m]

function [segments] = shape(segments, beta)

% loop over segments 
for i = 2:length(segments)
    % update local transform taking into account new position of frame -
    % reads beta to displace joint accordingly along y_axis
    segments{i}.local(3, 4) = beta(segments{i}.parent_id);
end
 
end
    
