# Supplementary material
Source: ML conference proceedings conference paper supplement (https://openaccess.thecvf.com/content/ICCV_2017/html/Remelli_Low-Dimensionality_Calibration_Through_ICCV_2017_paper.html)
Supplement: Supplementary file 3 [file Remelli_Low-Dimensionality_Calibration_Through_ICCV_2017_supplemental.zip › additional_material/code/hmodel/src/test_insideness.m]

function [is_inside] = test_insideness(p, q, s)
if  norm(p - s) - norm(q - s) > 10e-7
    is_inside = false;
else
    is_inside = true;
end
