# Supplementary material
Source: ML conference proceedings conference paper supplement (https://openaccess.thecvf.com/content/ICCV_2017/html/Remelli_Low-Dimensionality_Calibration_Through_ICCV_2017_paper.html)
Supplement: Supplementary file 3 [file Remelli_Low-Dimensionality_Calibration_Through_ICCV_2017_supplemental.zip › additional_material/code/hmodel/src/update_centers.m]

function [ hand_model ] = update_centers(hand_model)
%UNTITLED3 Summary of this function goes here
%   Detailed explanation goes here


for i = 1:length(hand_model.palm_wrist_centers)
     new_position = hand_model.global_pose * [hand_model.palm_wrist_centers_relative{i}; 1];
     hand_model.palm_wrist_centers{i} = new_position(1:3);
end
