# Supplementary material
Source: ML conference proceedings conference paper supplement (https://openaccess.thecvf.com/content/ICCV_2017/html/Remelli_Low-Dimensionality_Calibration_Through_ICCV_2017_paper.html)
Supplement: Supplementary file 3 [file Remelli_Low-Dimensionality_Calibration_Through_ICCV_2017_supplemental.zip › additional_material/code/hmodel/src/update_fingers_shape.m]

function [ segments ] = update_fingers_shape(segments, beta )
%UNTITLED3 Summary of this function goes here
%   Detailed explanation goes here

for i = 1:length(segments)
    [segments{i}] = shape(segments{i}, beta{i});
end
